# Supplementary material for: Copper-catalyzed [3 + 2] cycloaddition reactions: synthesis of substituted pyrazolo[1,5-c]quinazolines with N-iminoquinazolinium ylides and olefins as starting materials
Source: Royal Society of Chemistry journal article supplement (doi:10.1039/c6ra22006a), 2016-01-01

## Supporting Information

**Copper-catalyzed [3+2] cycloaddition reaction: Synthesis of substituted pyrazolo[1,5-c]quinazolines with N-iminoquinazolinium ylide and olefin as starting materials**

Haiyan Feng, Tao Wang\*, Songtao Chen, Yangfei Huang, Weijie Yu, Yuanyuan Huang, Fei Xiong\*

### The $^1\text{H}$ NMR and $^{13}\text{C}$ NMR Spectra of Compounds 3aa-3ea

**3aa**

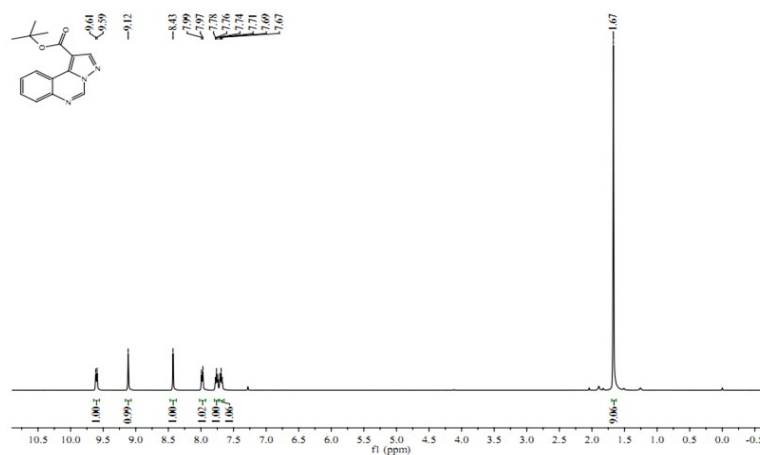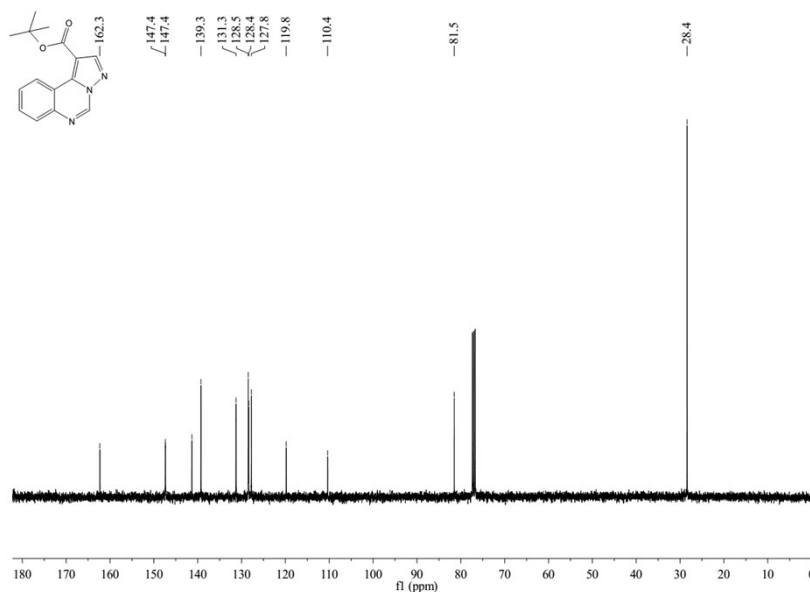

3ab

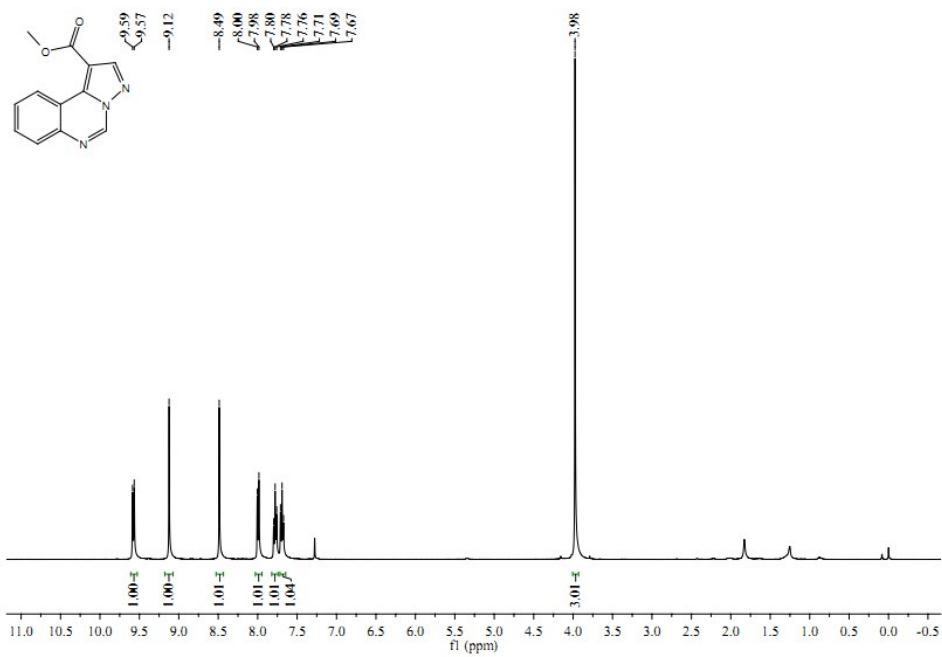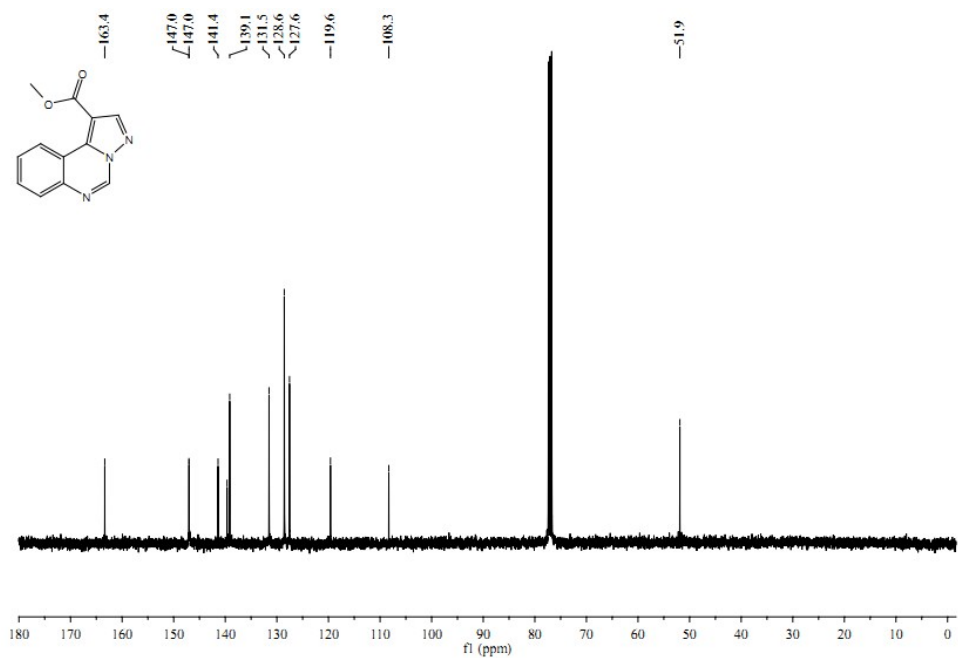

3ac

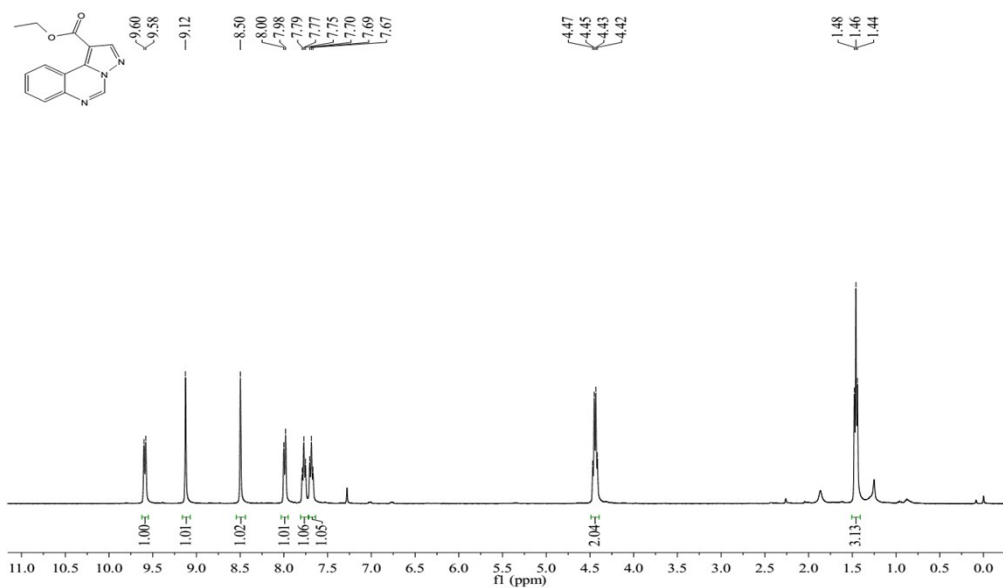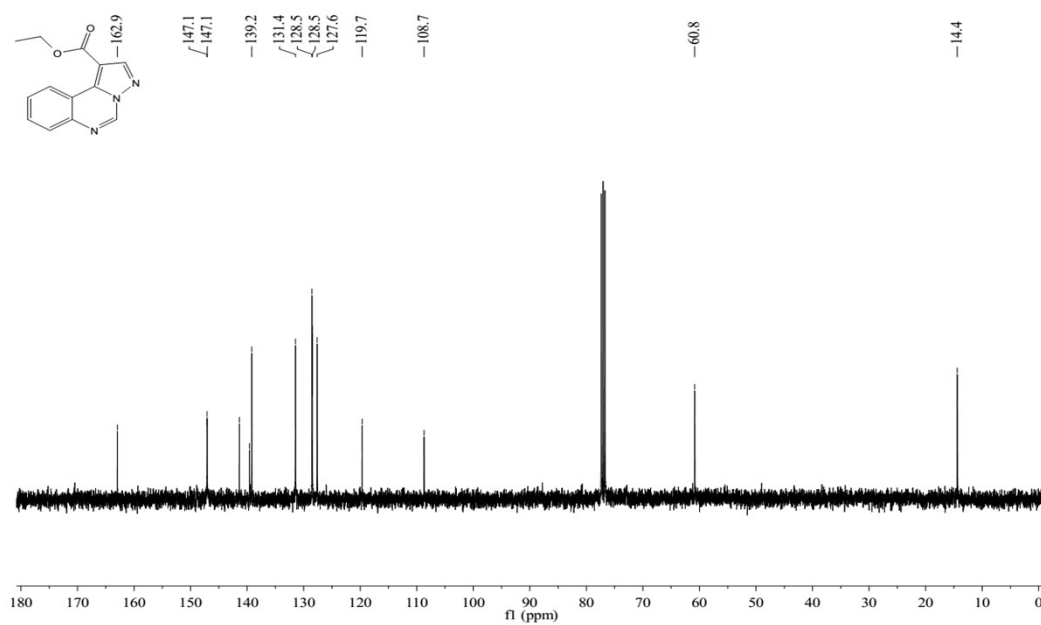

3ad

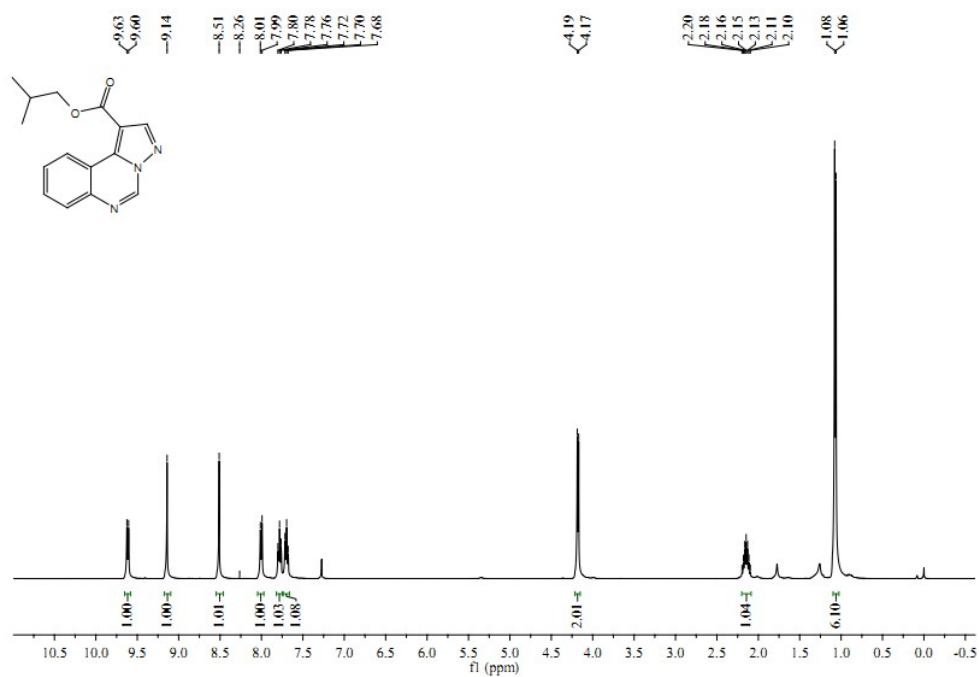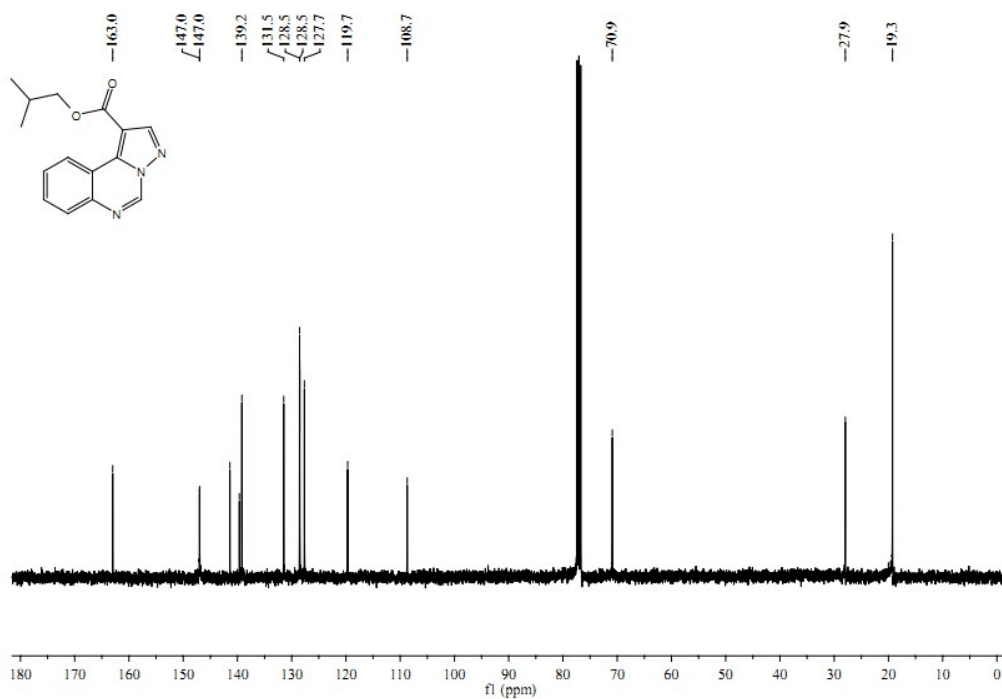

3ae

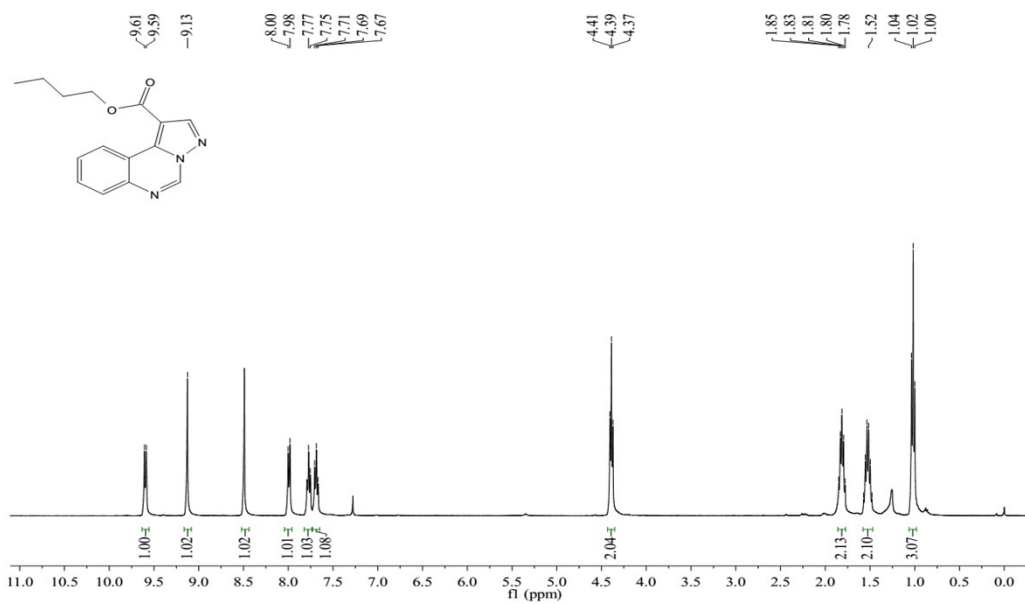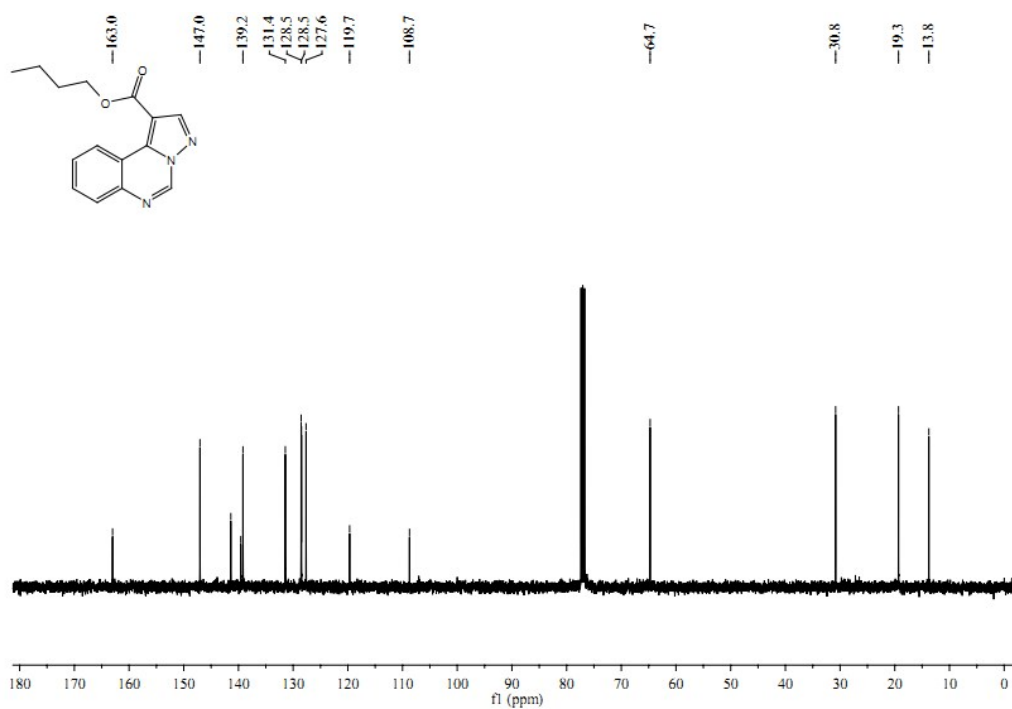

3af

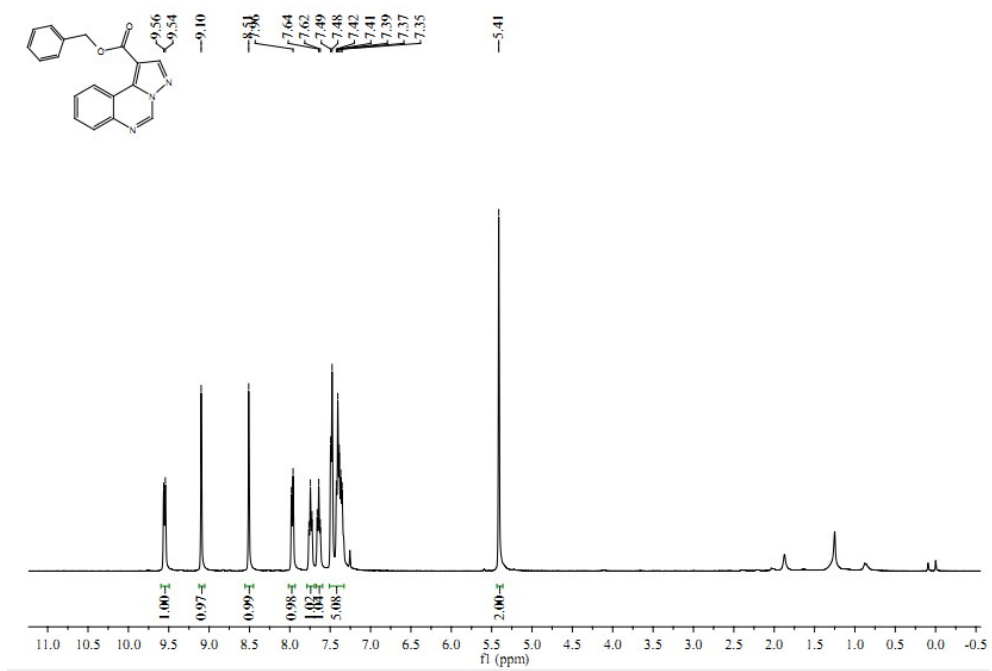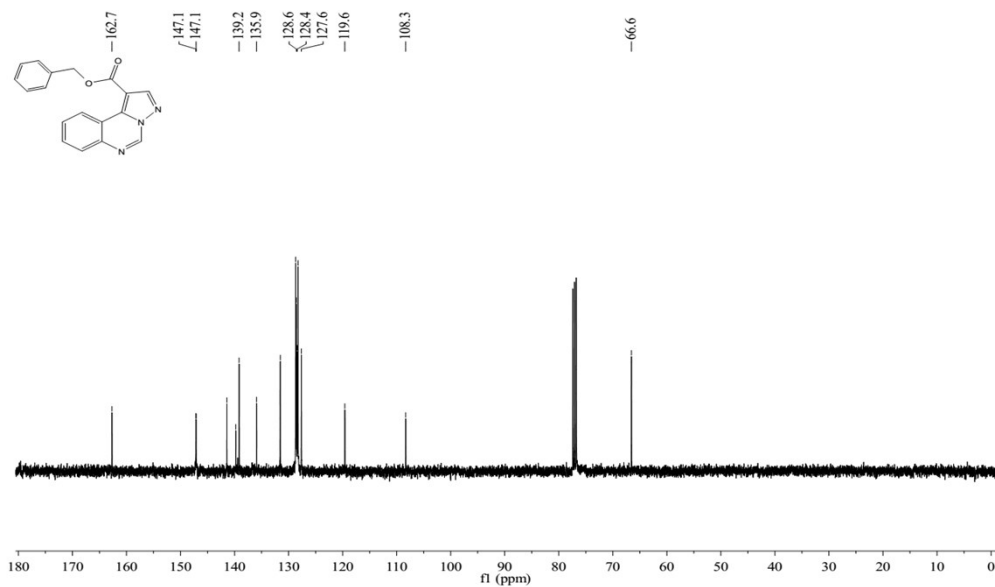

3ag

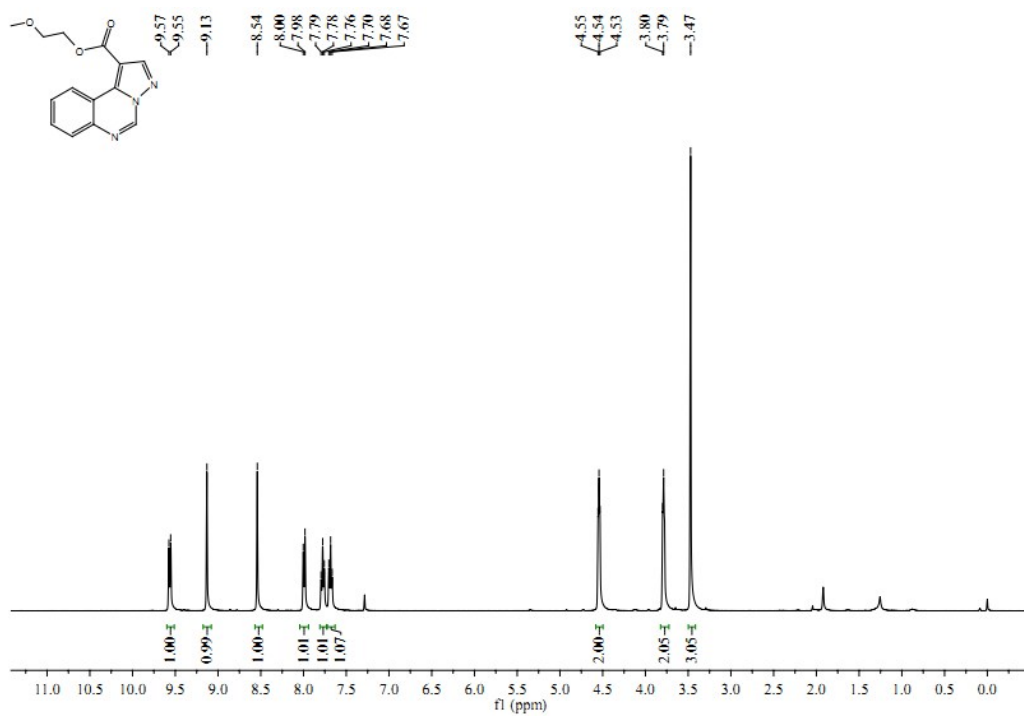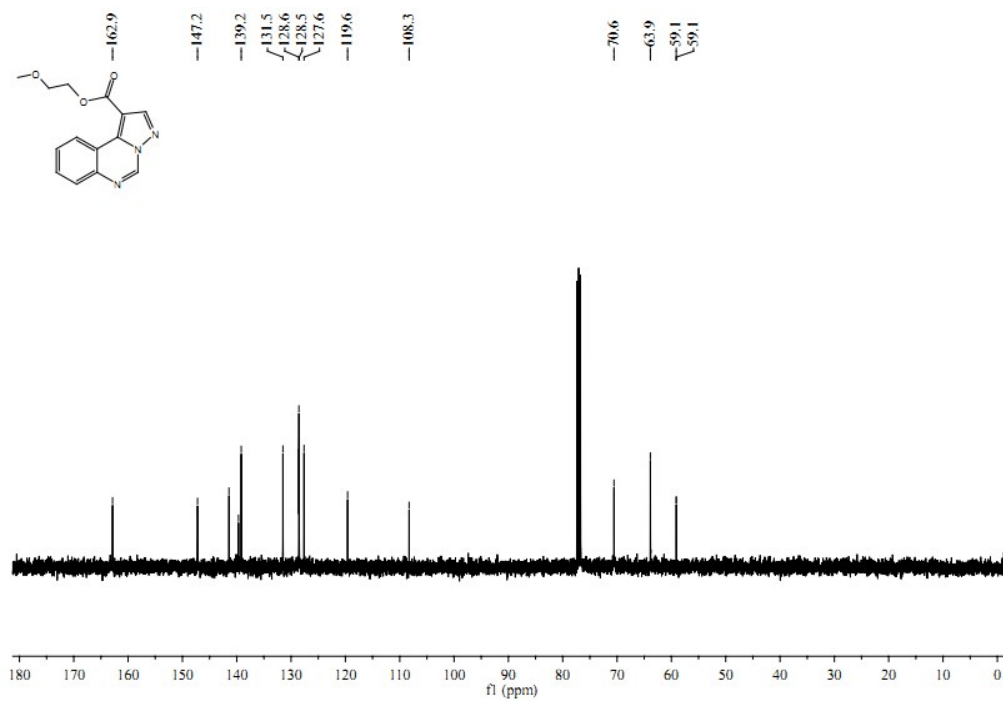

3ah

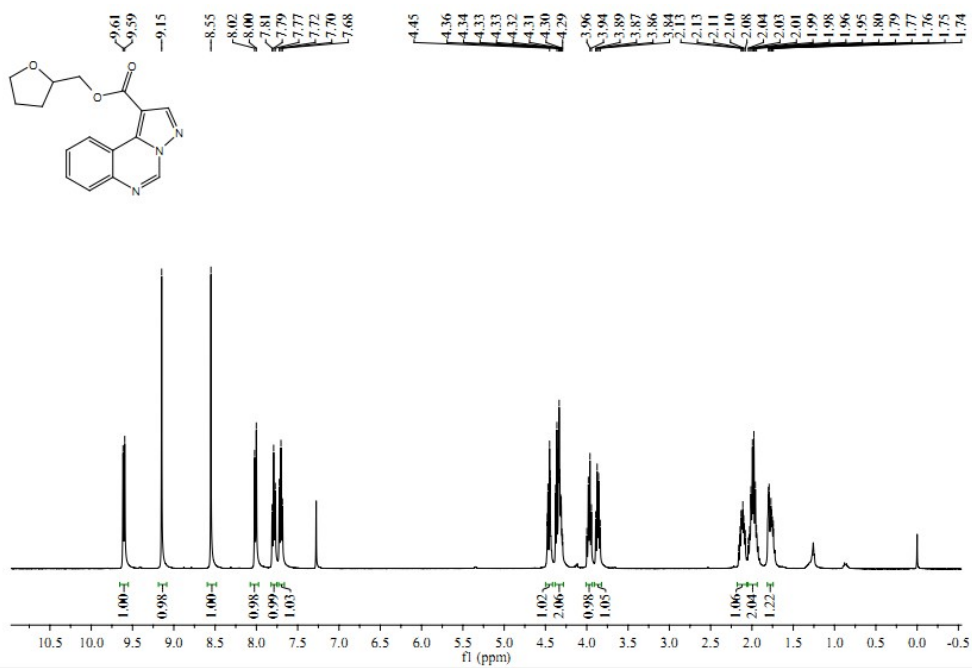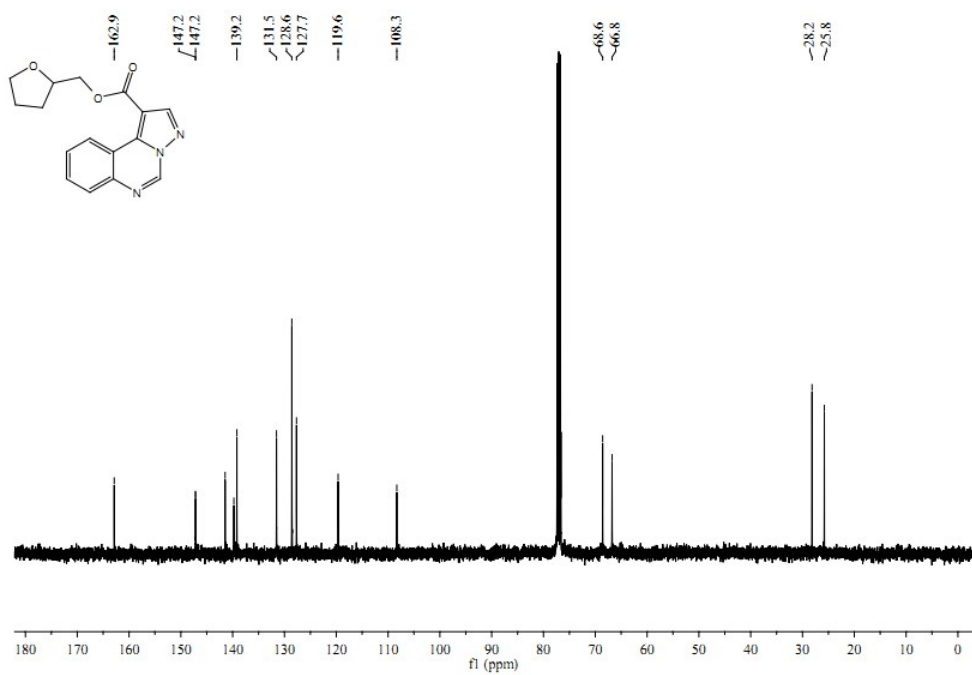



3ai

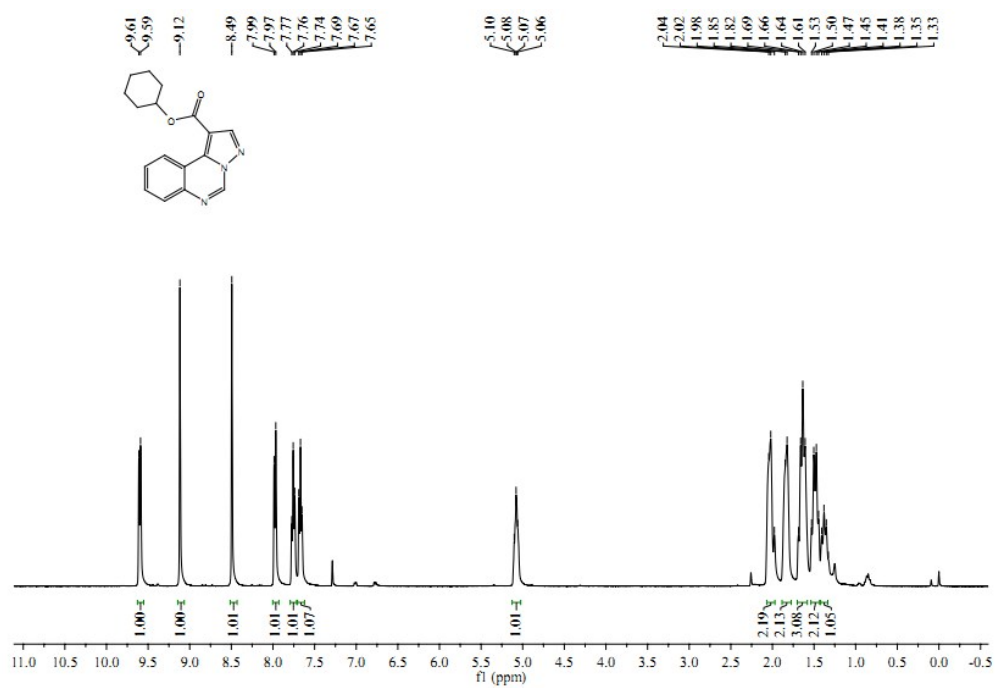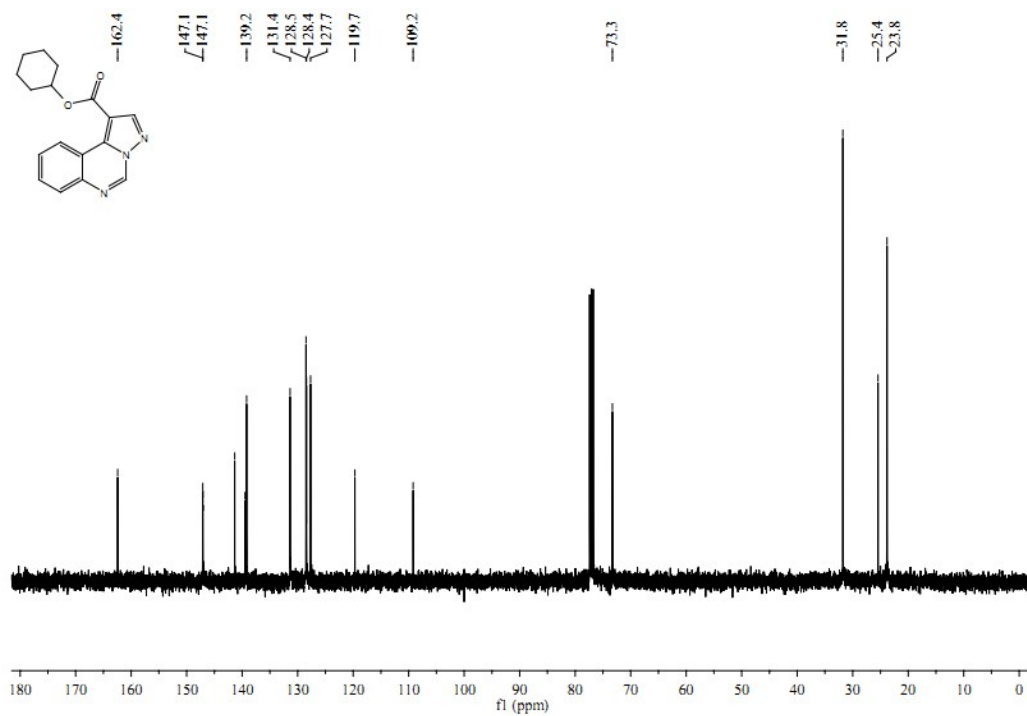

3aj

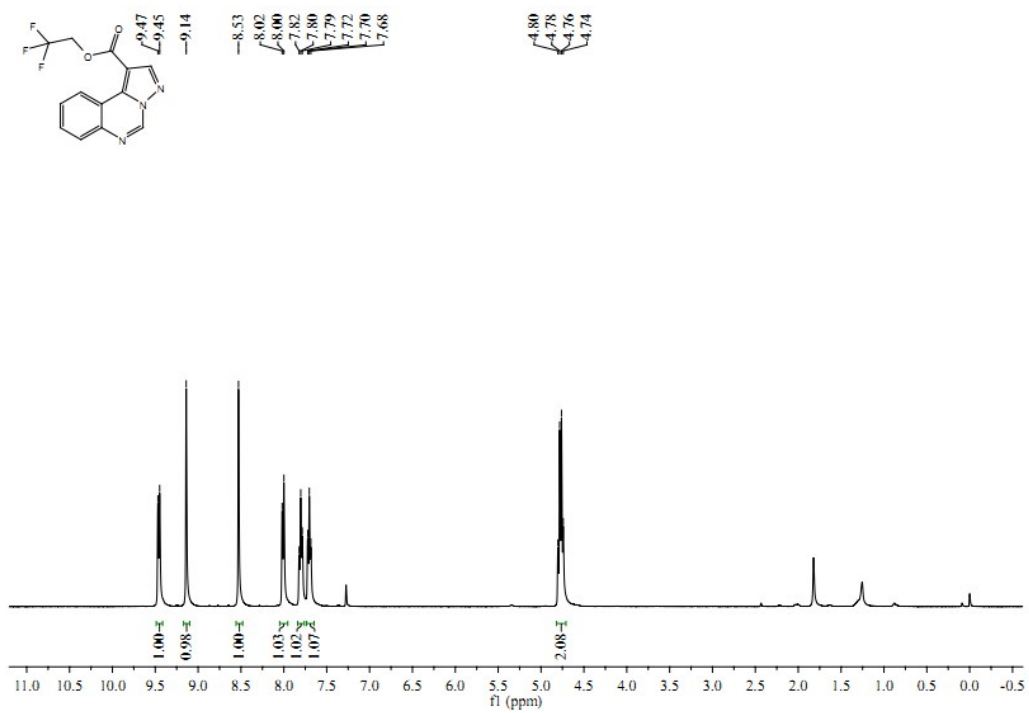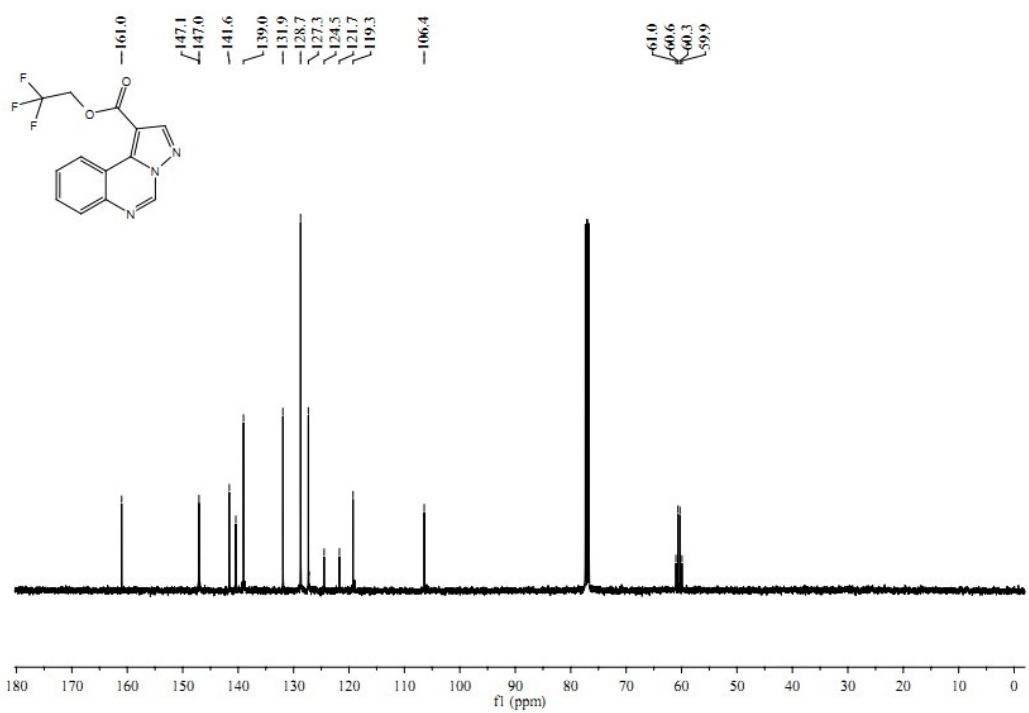

3ak

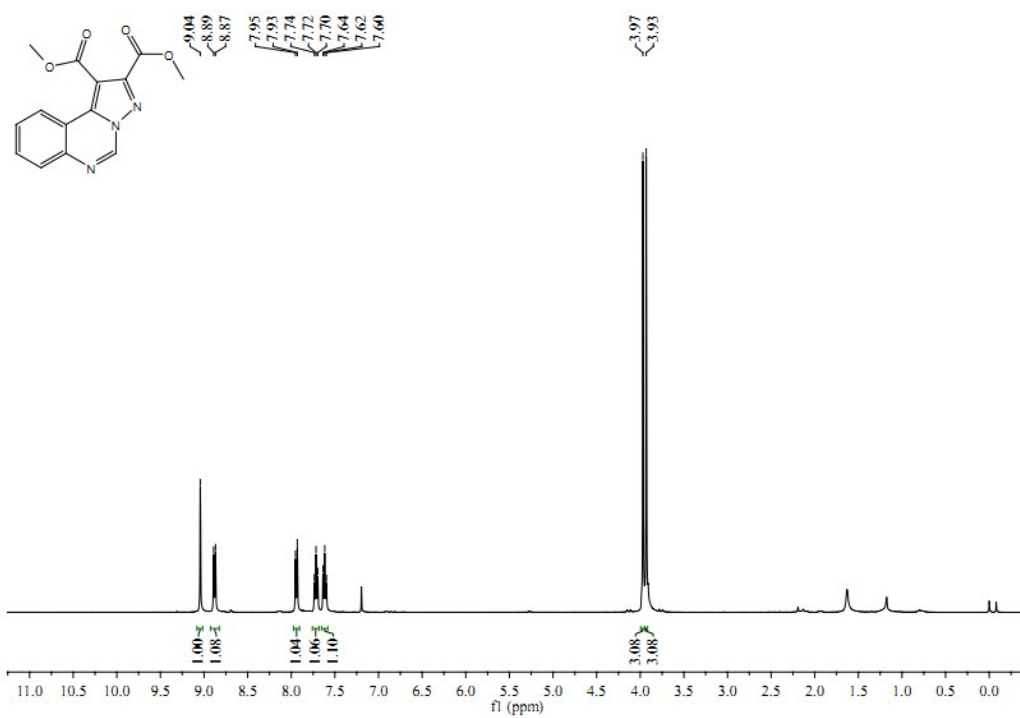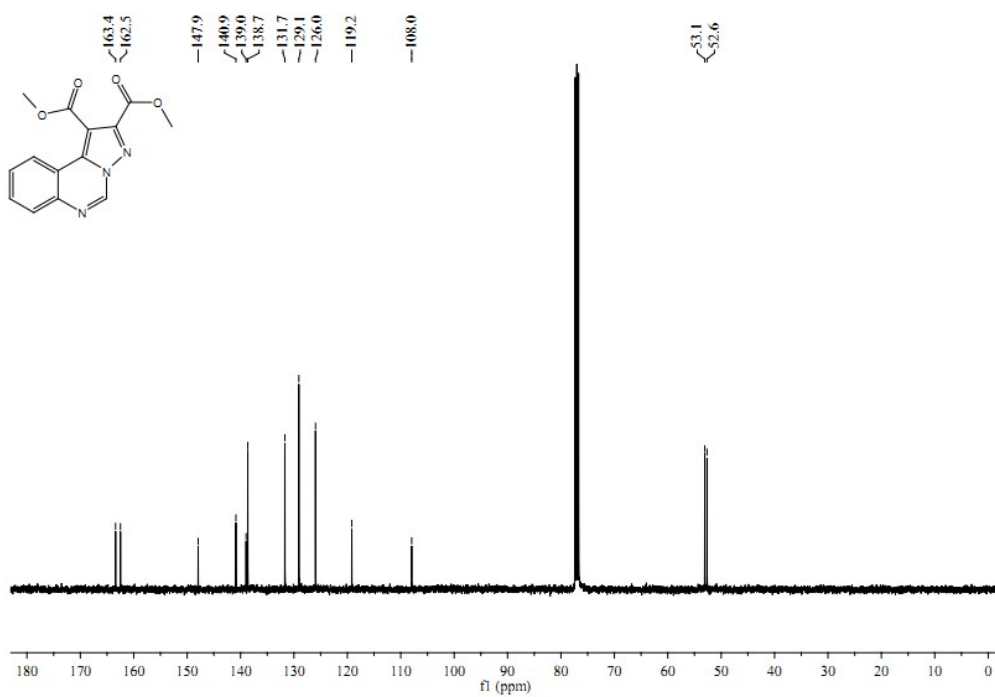

3al

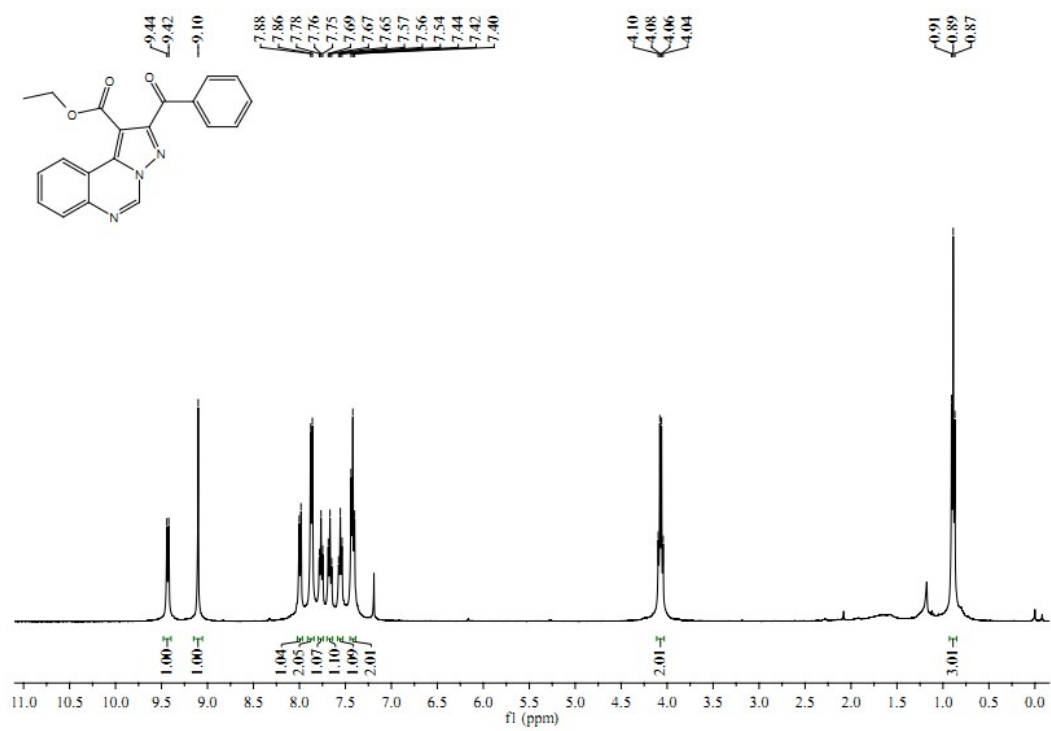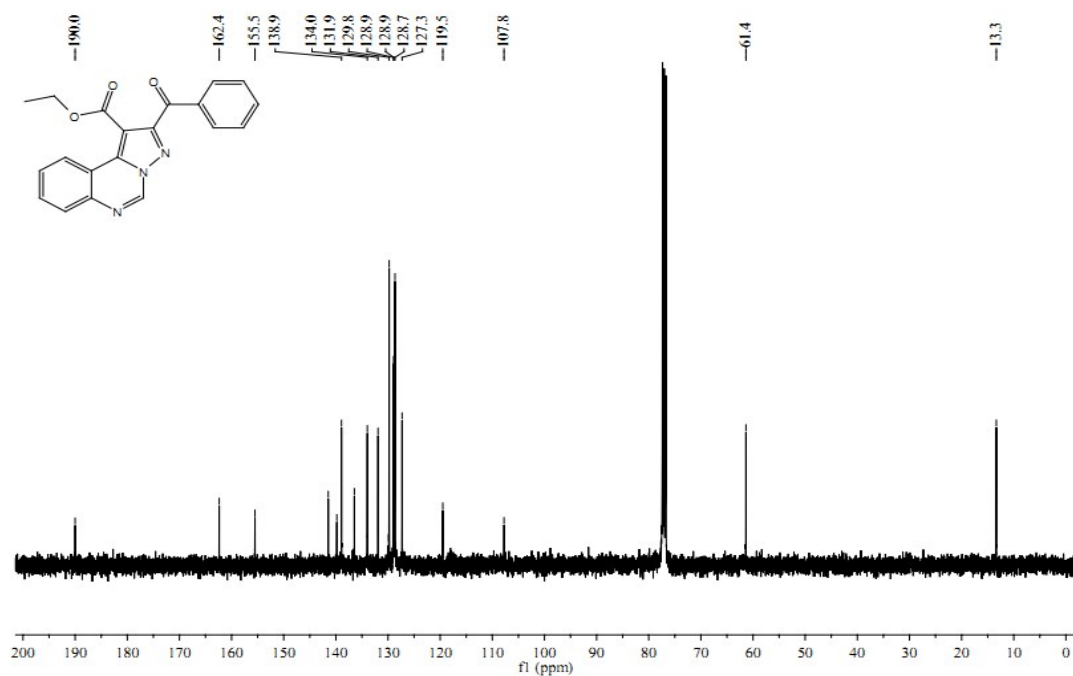

3a'

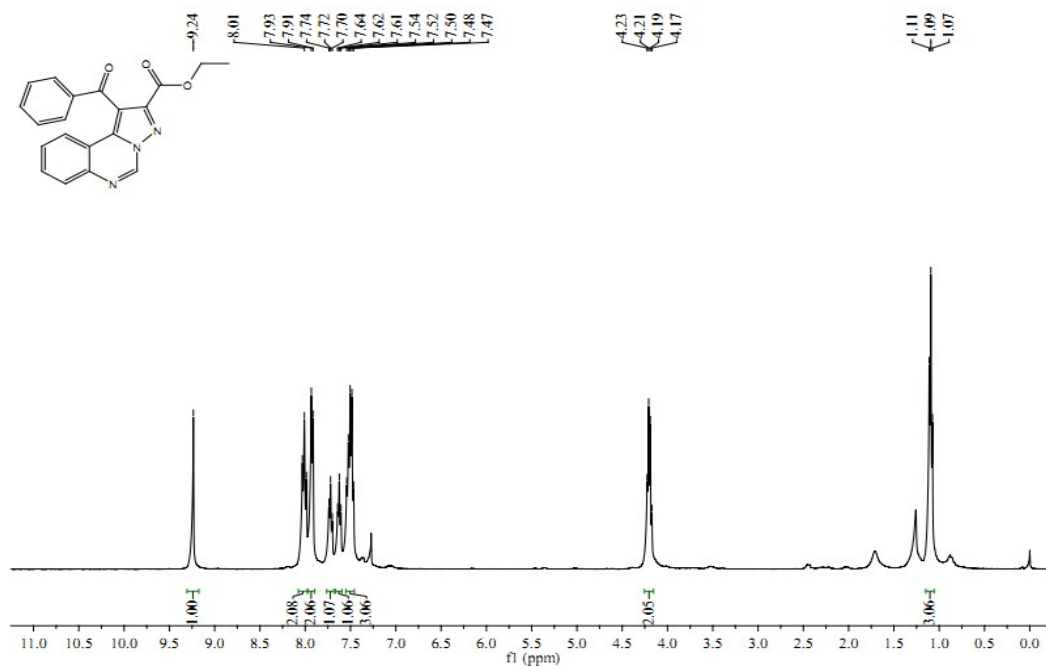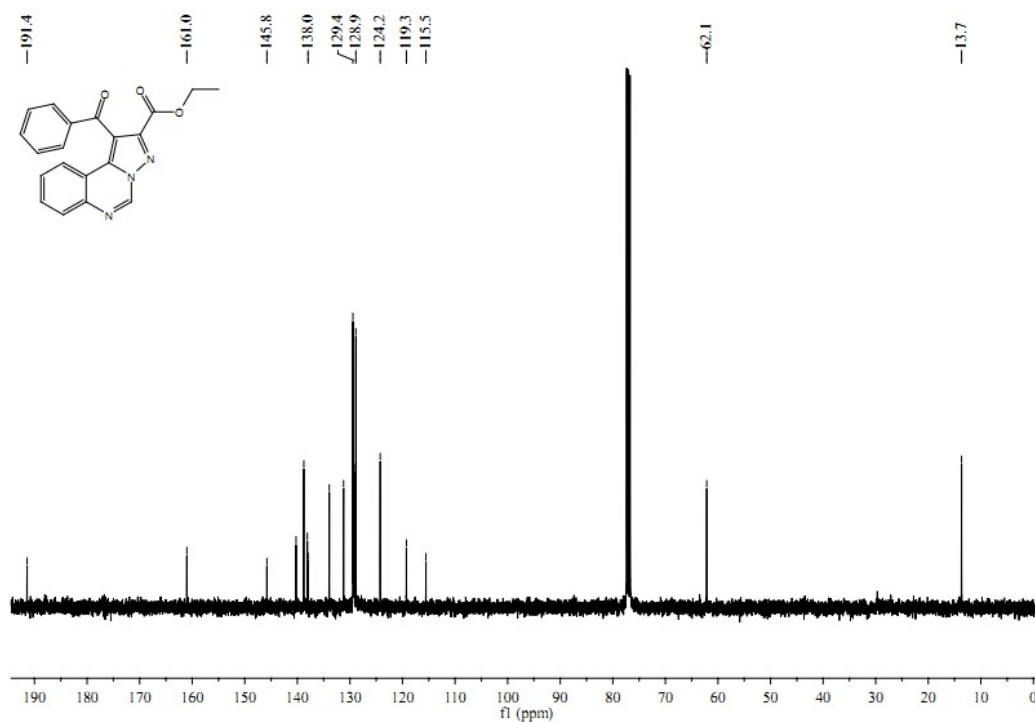

3am

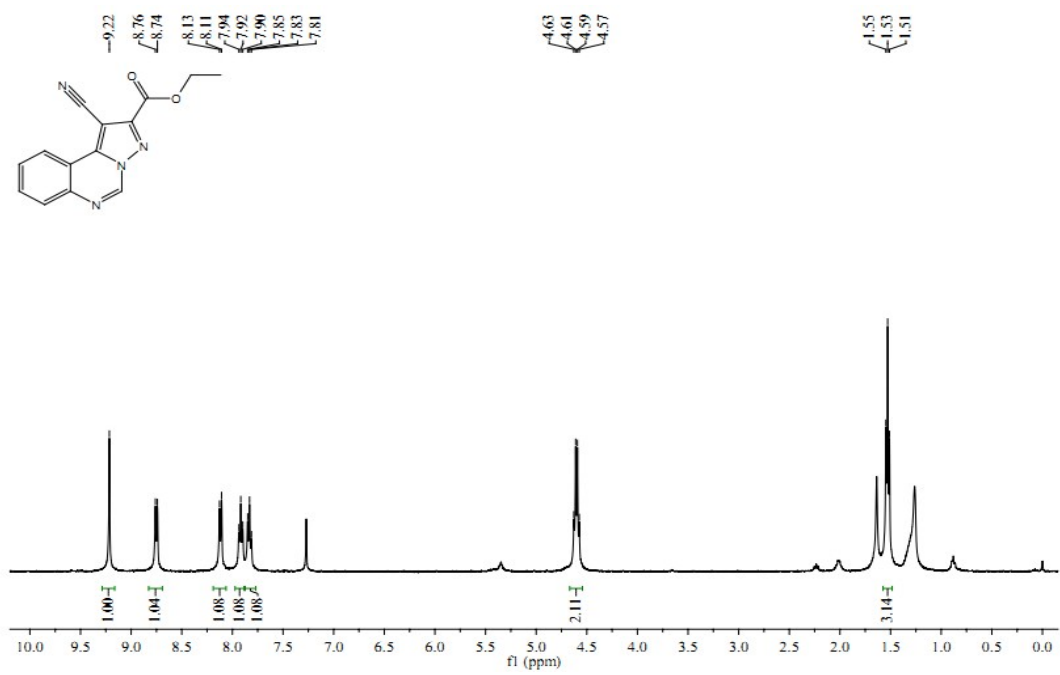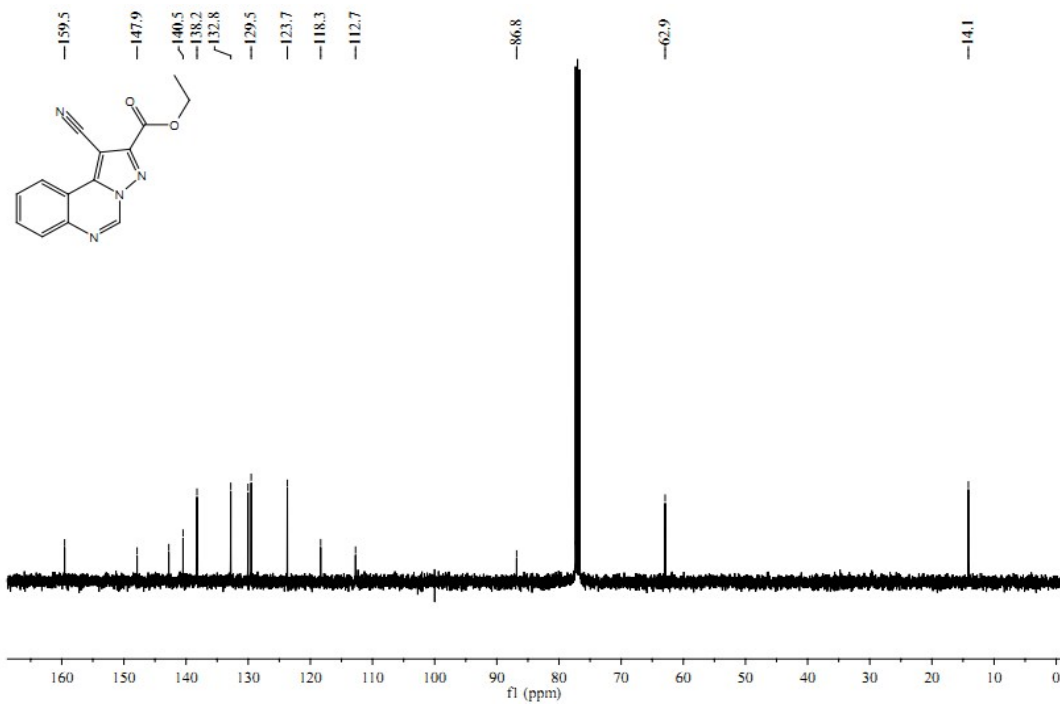

**3an**

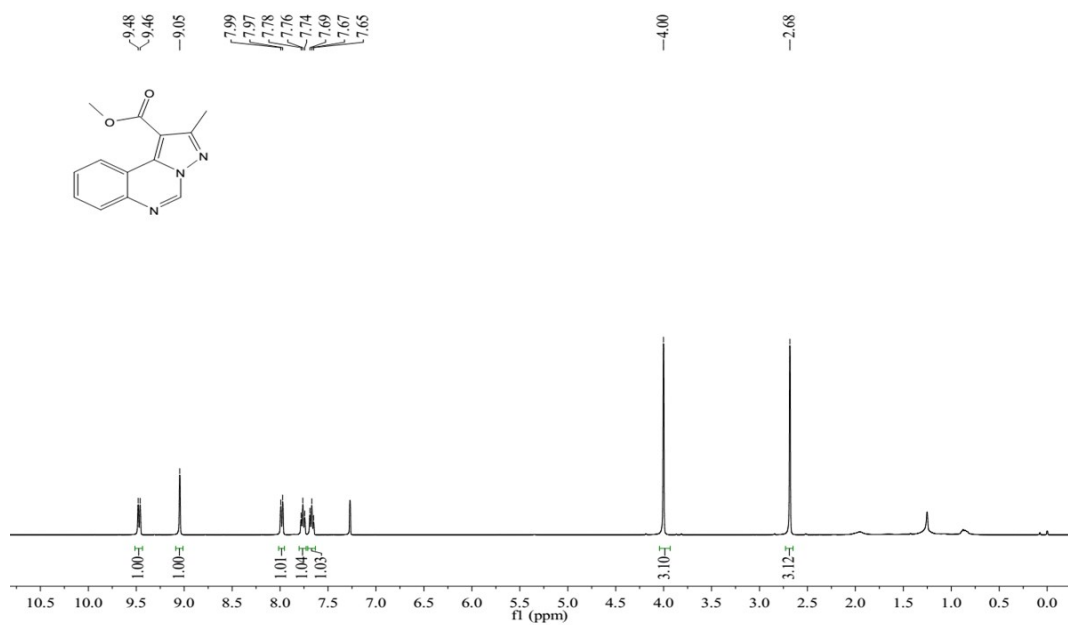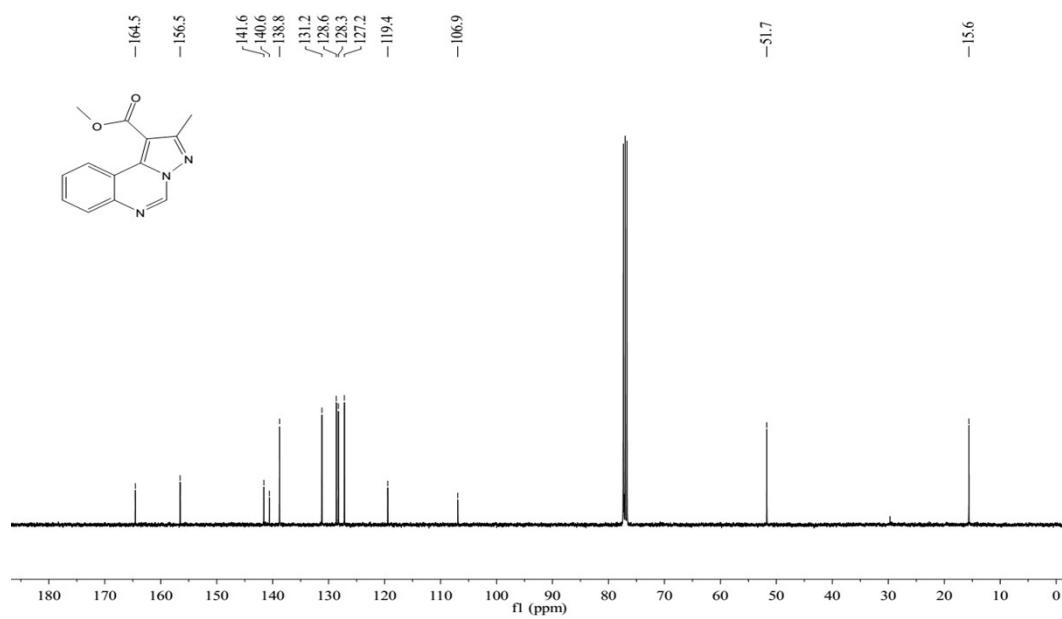

3ao

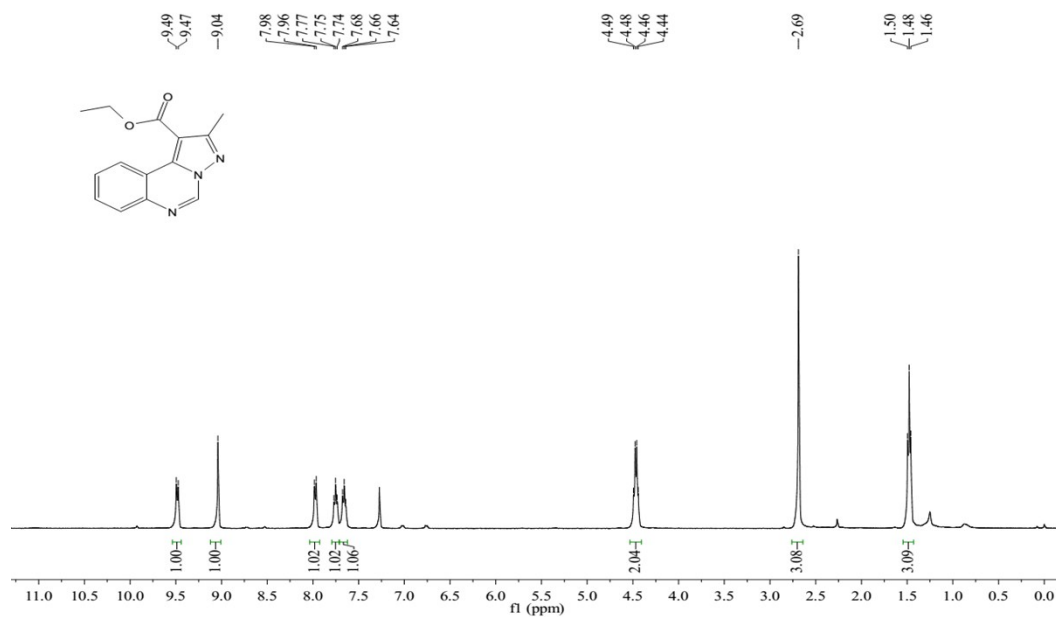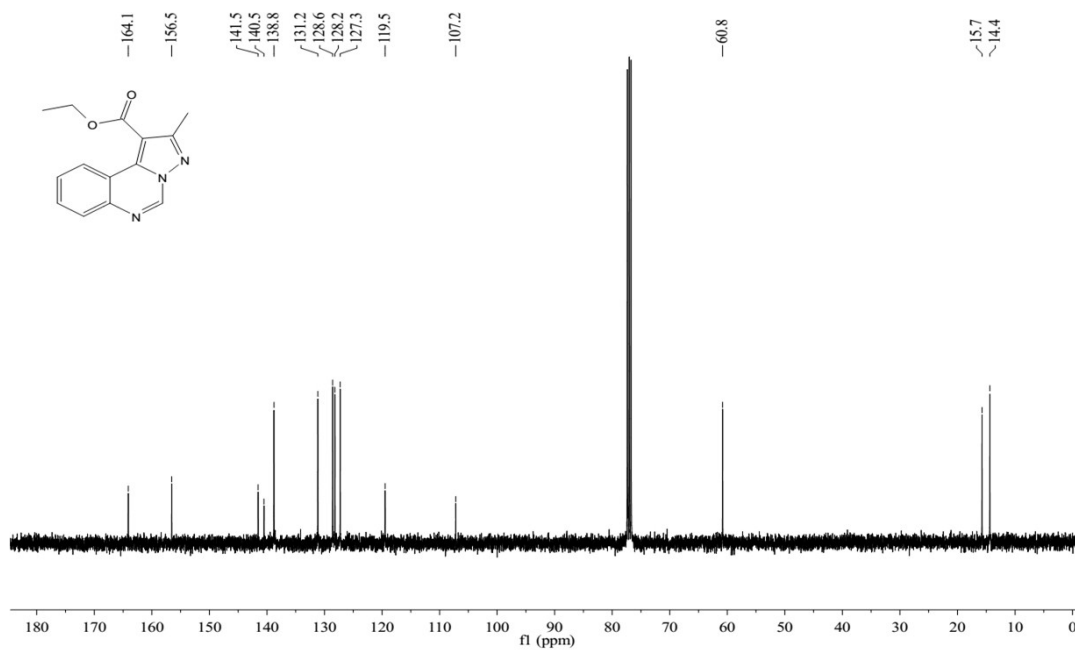



3ap

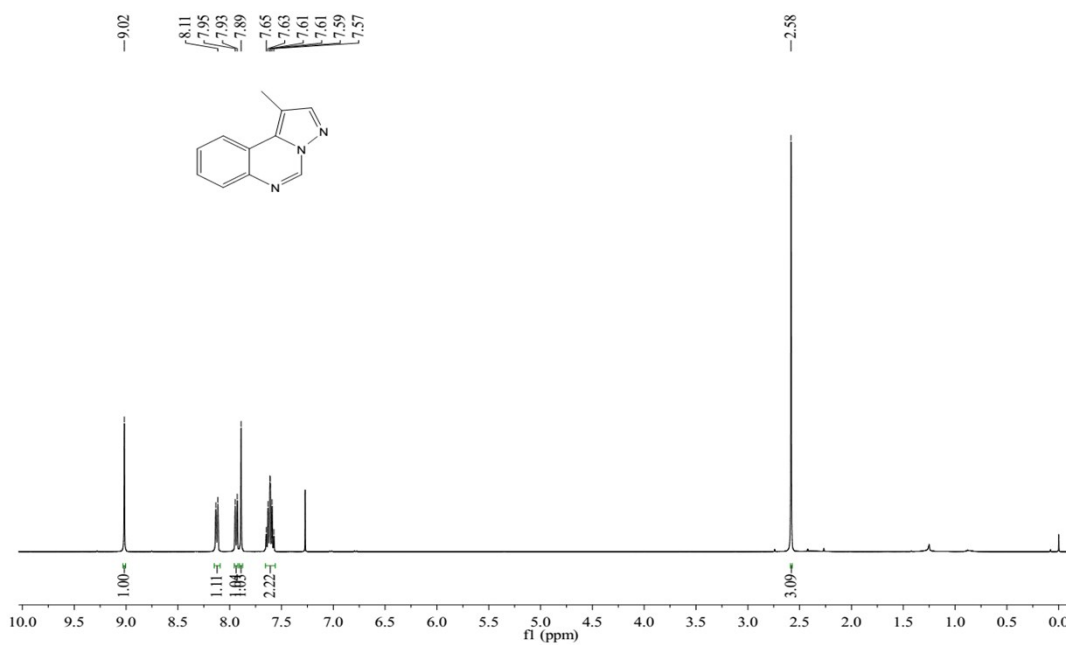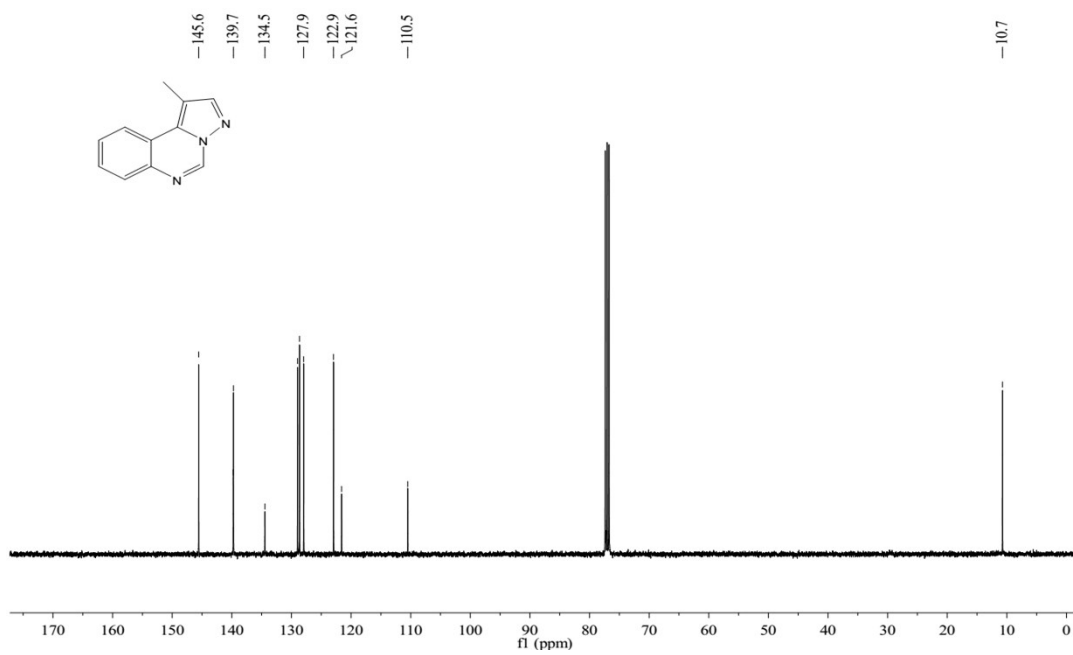

3aq

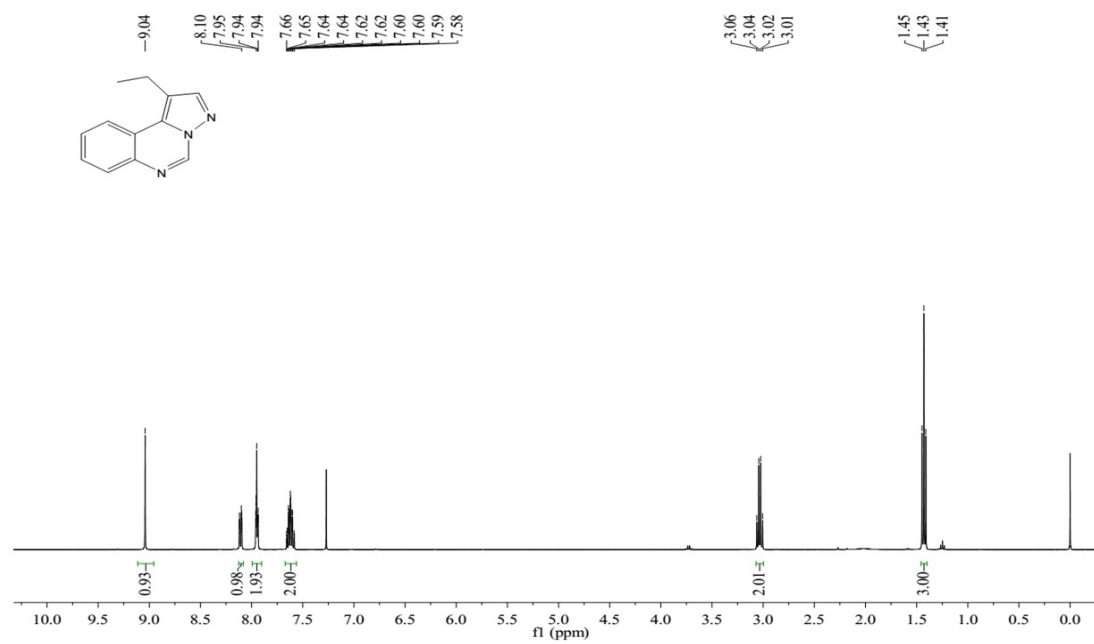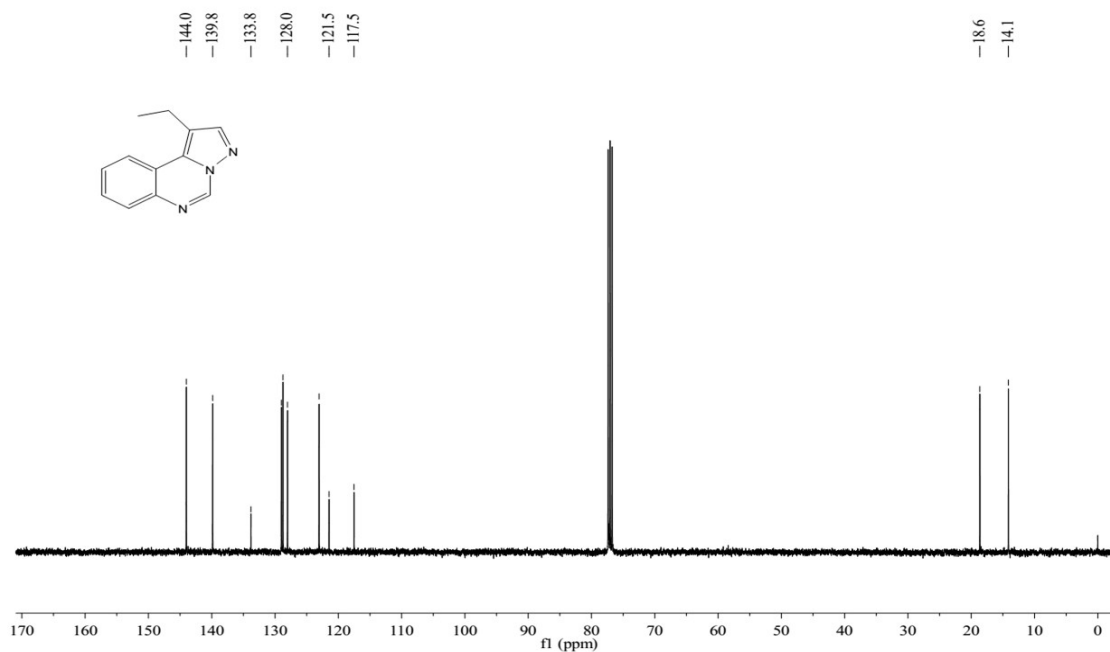

3ar

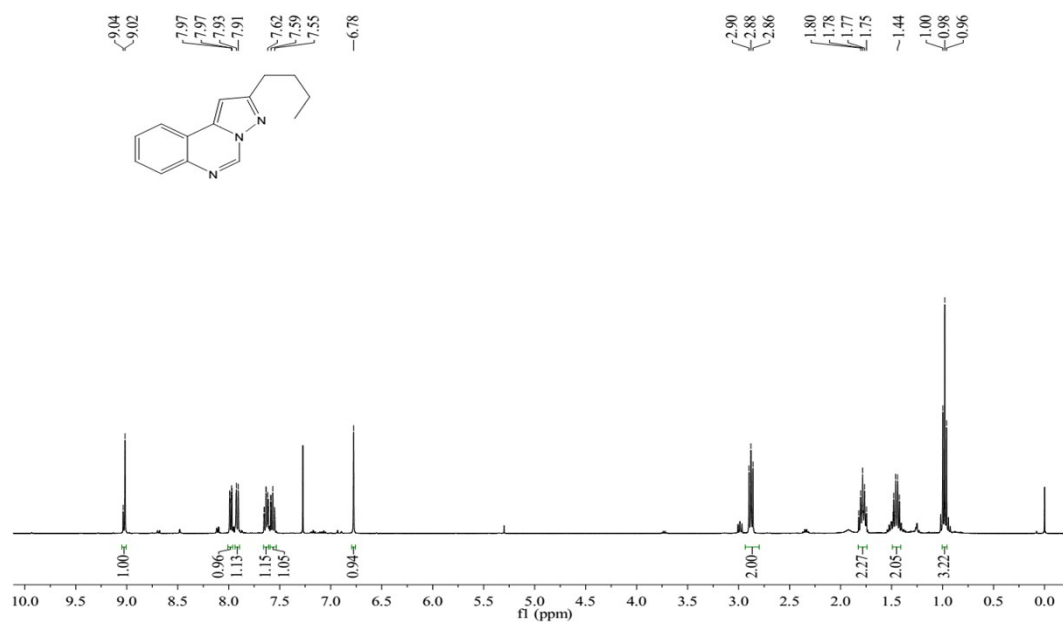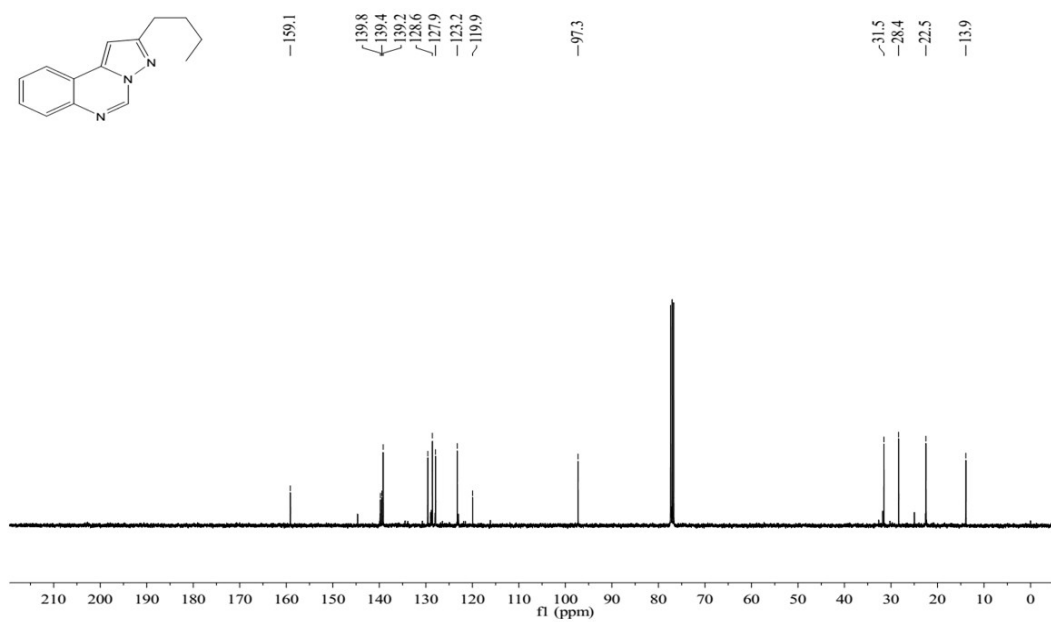

3as

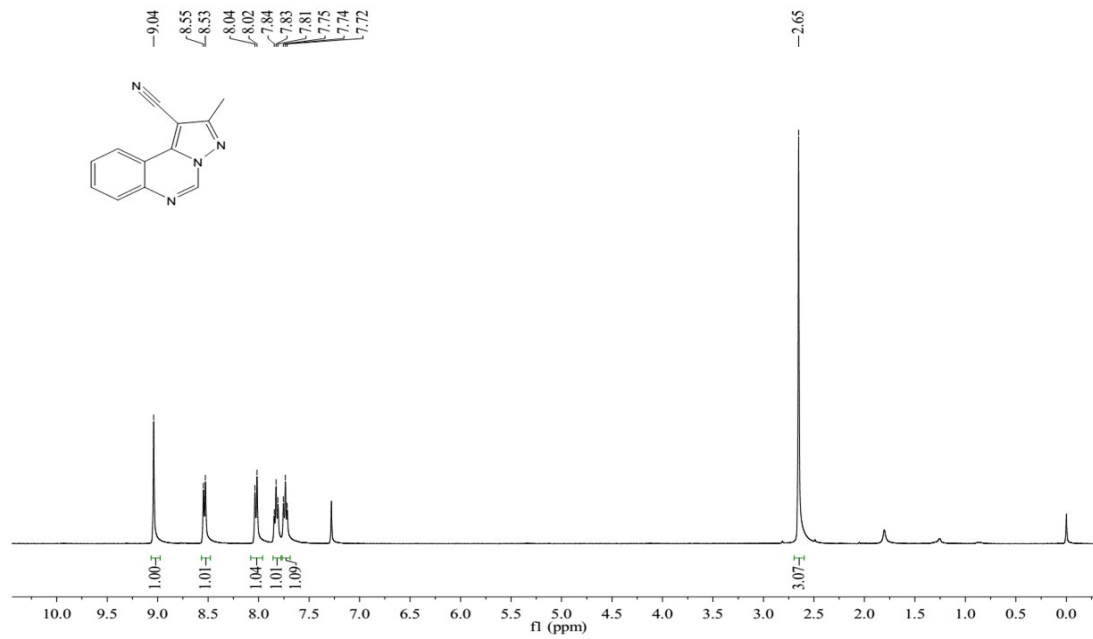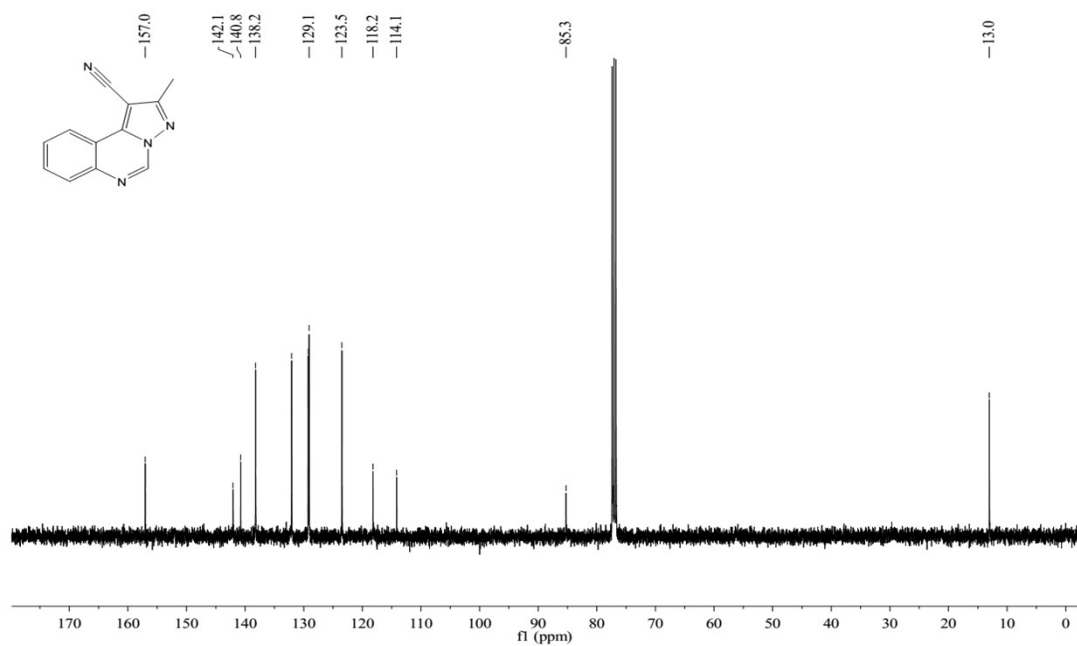

3at

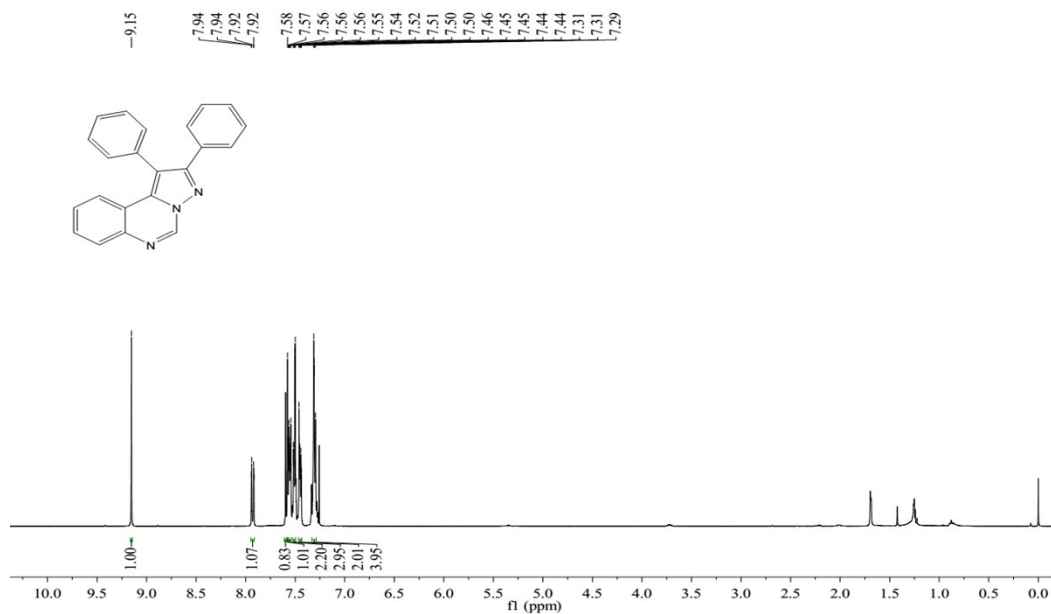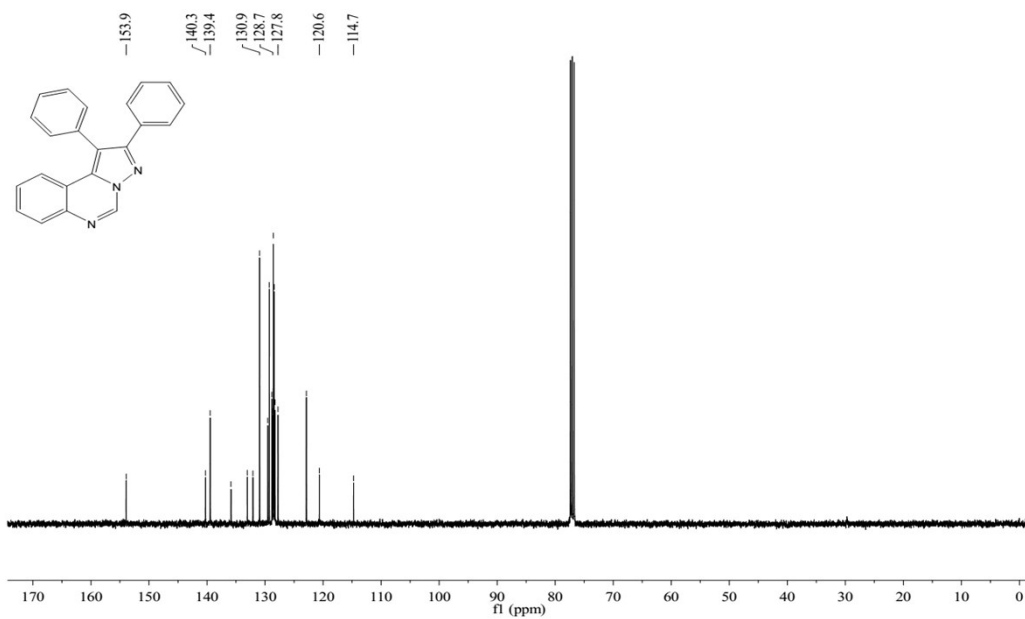

3au

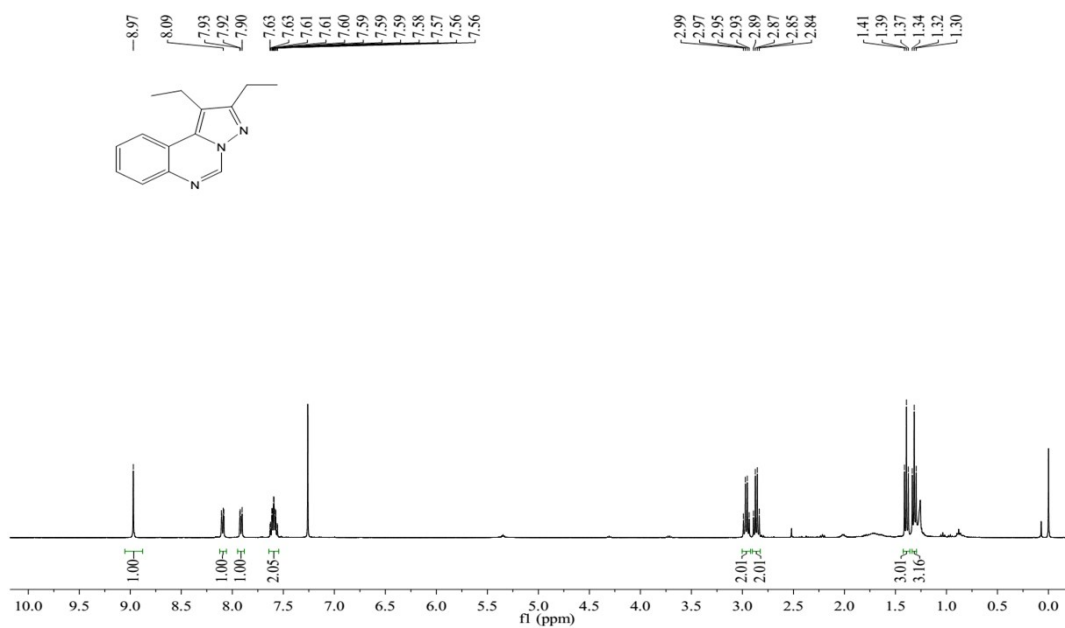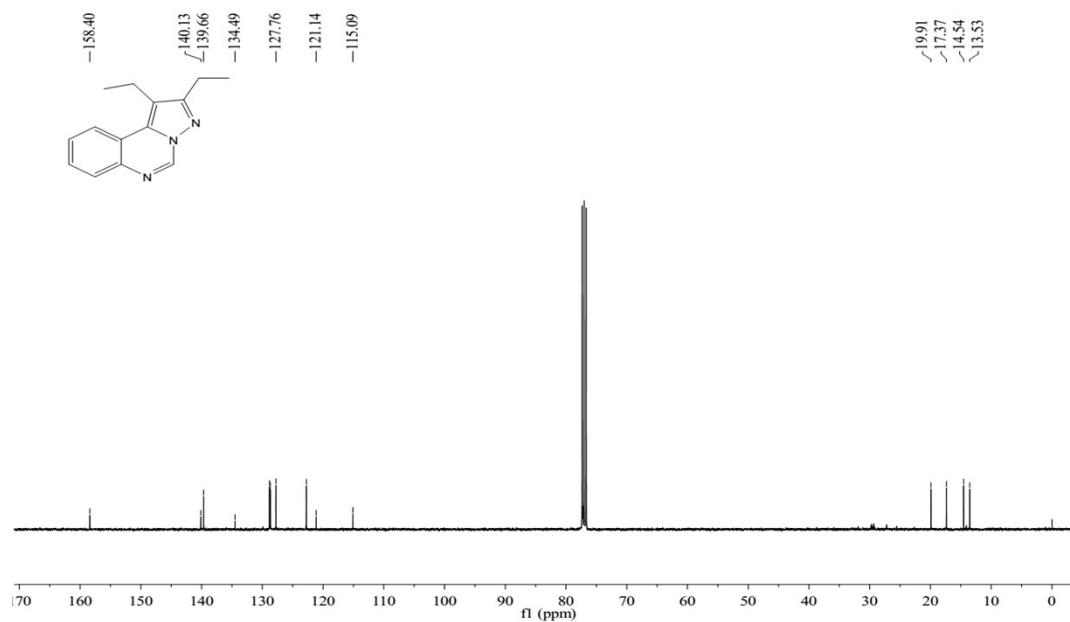

3ba

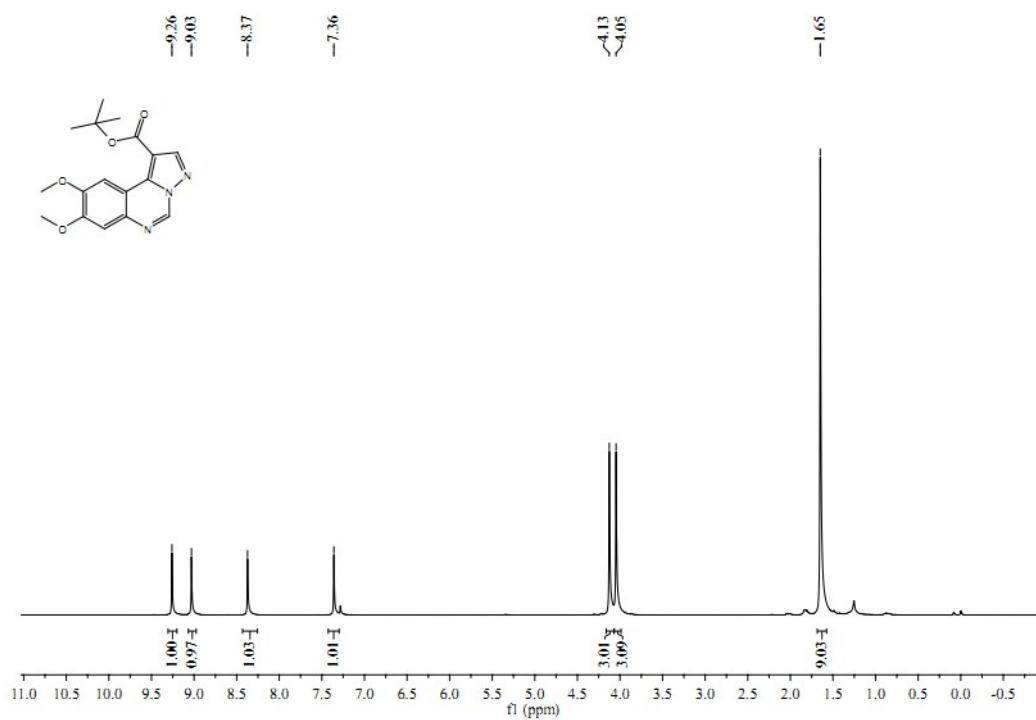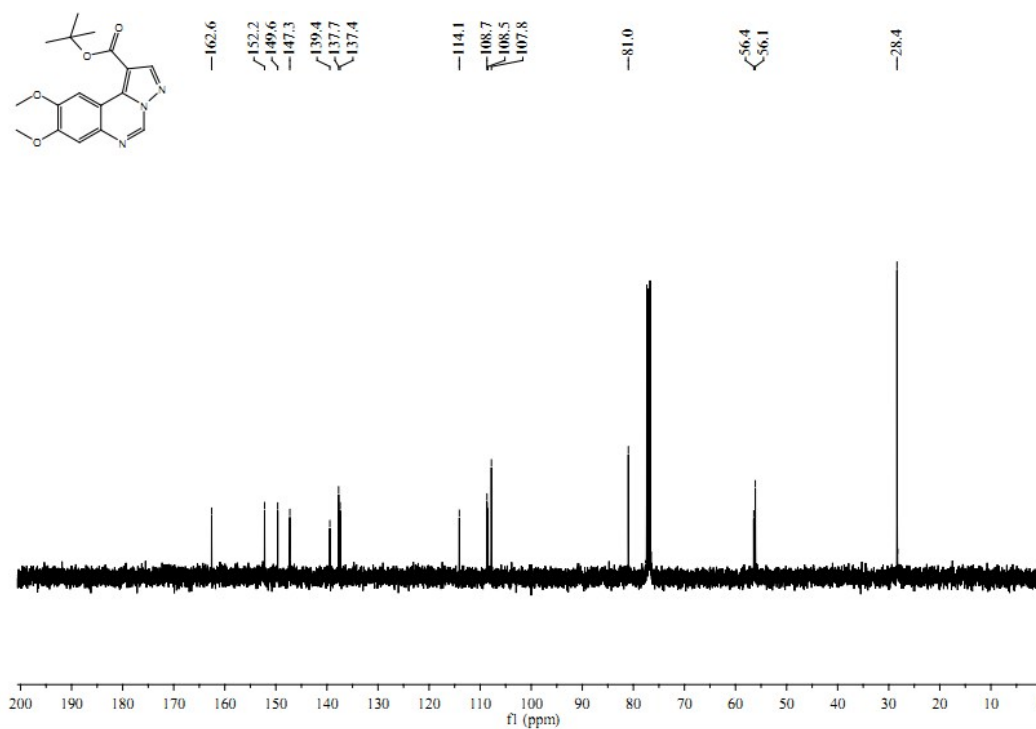

3ca

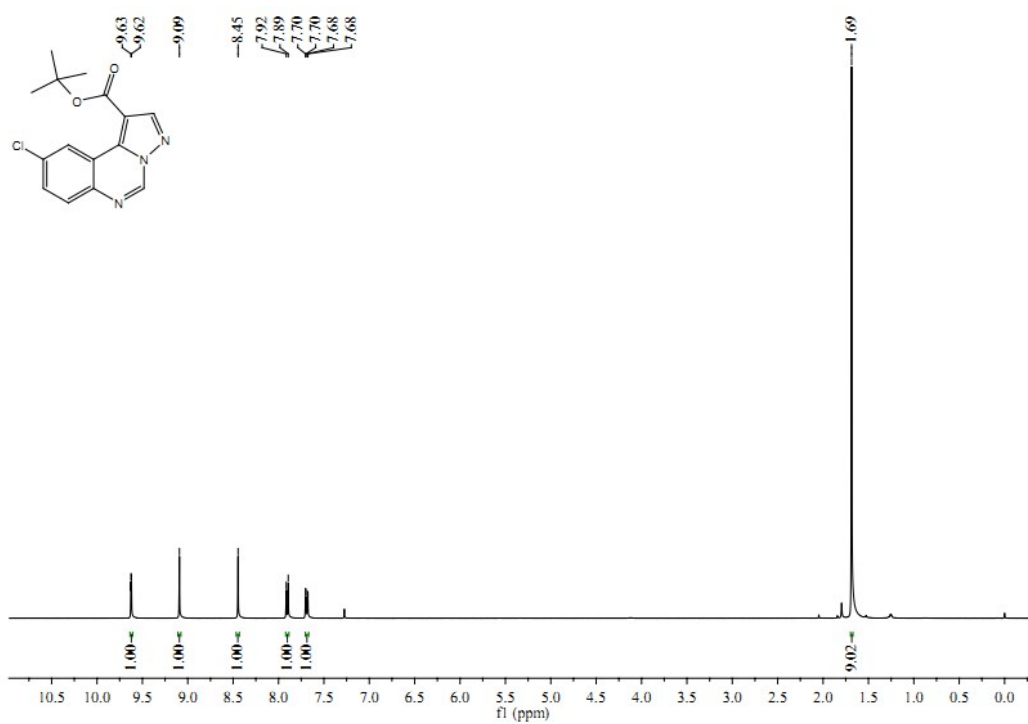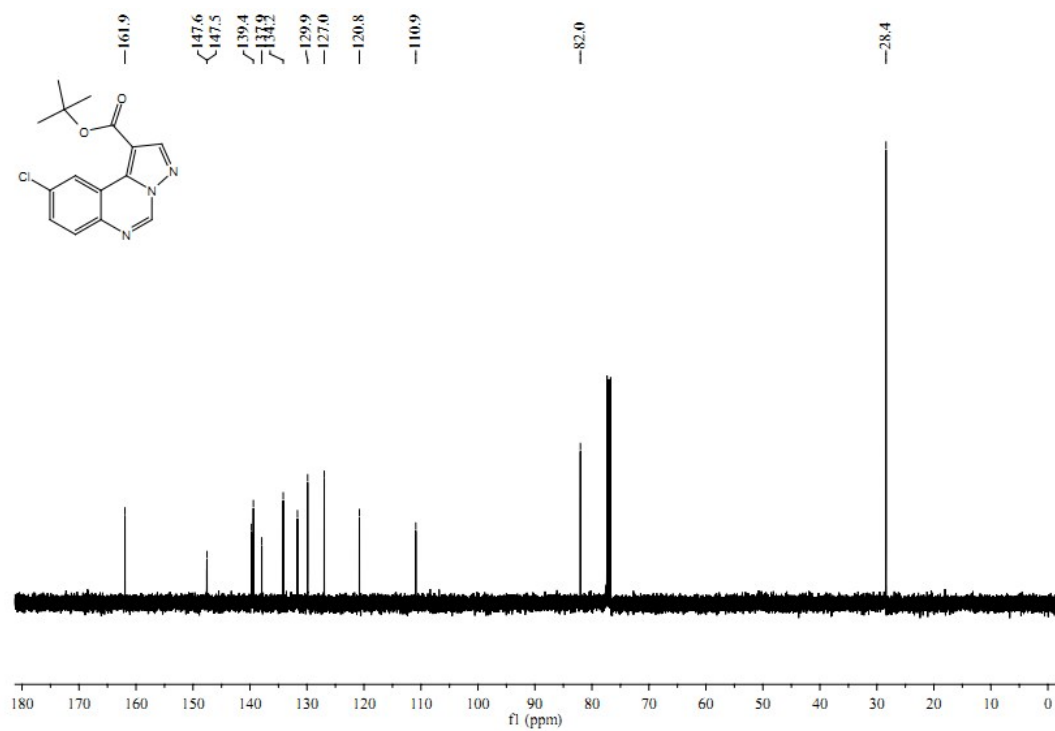



3da

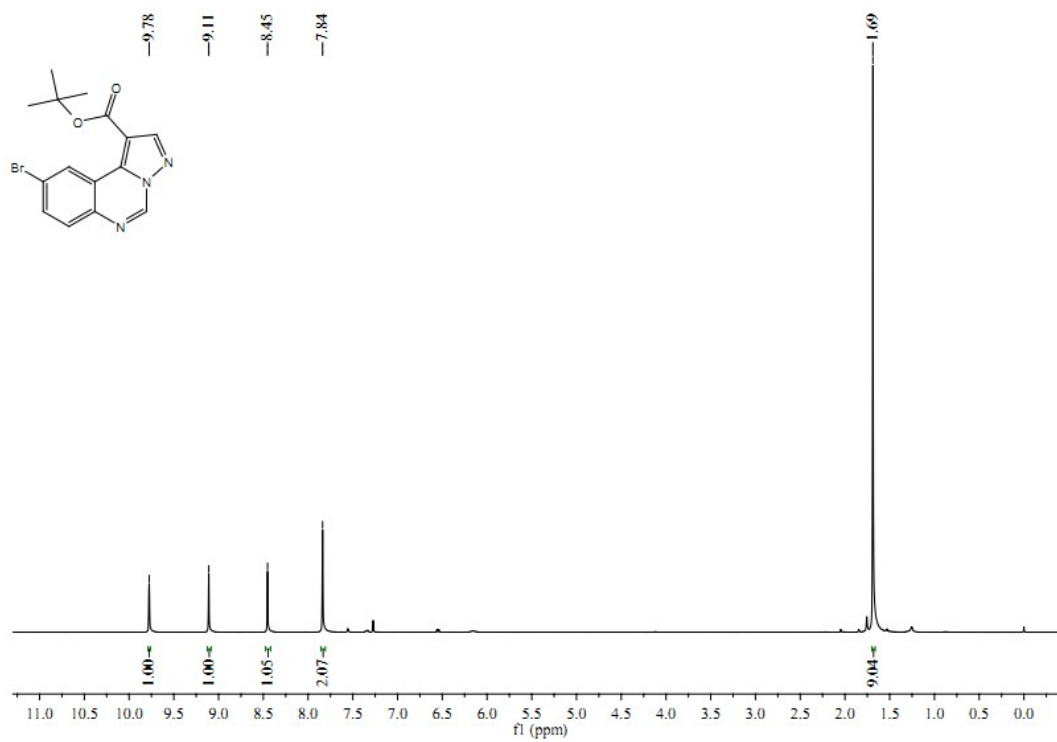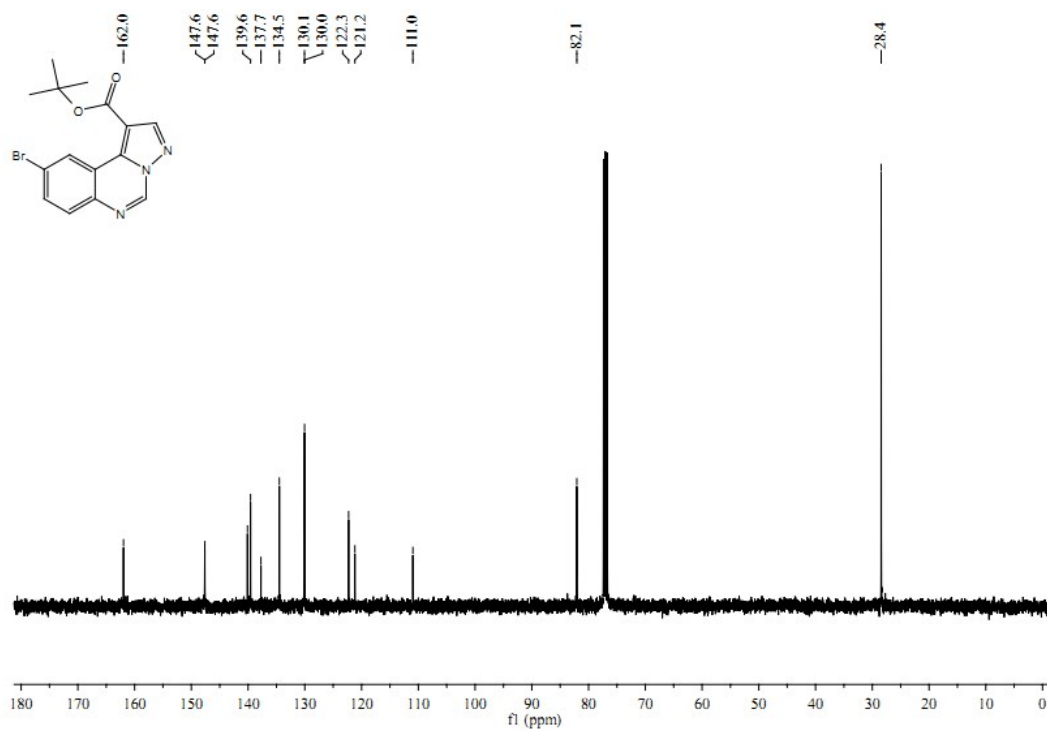

3ea

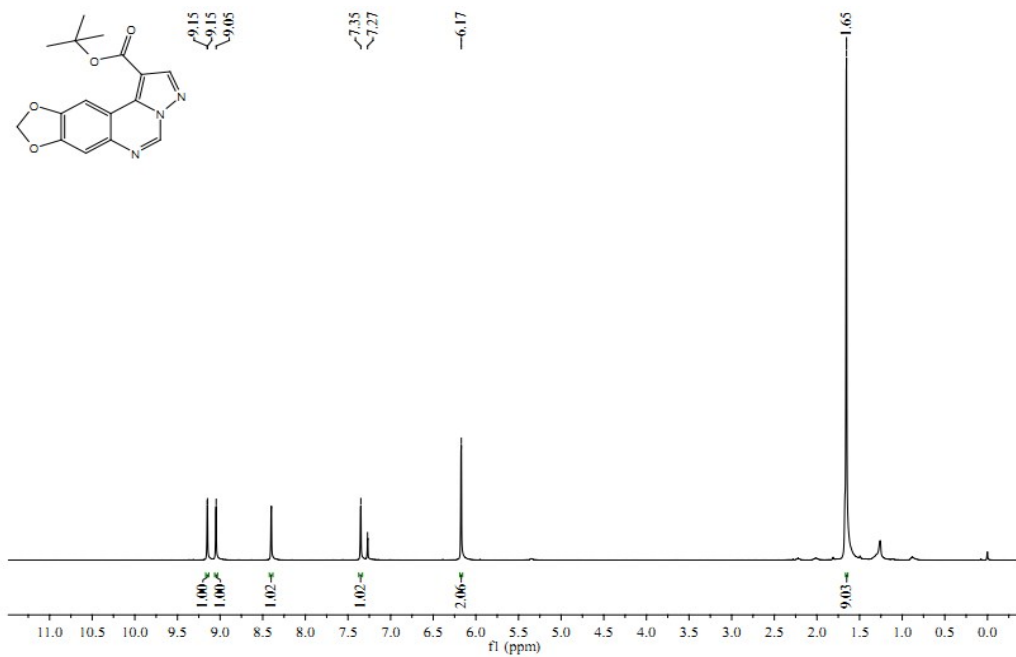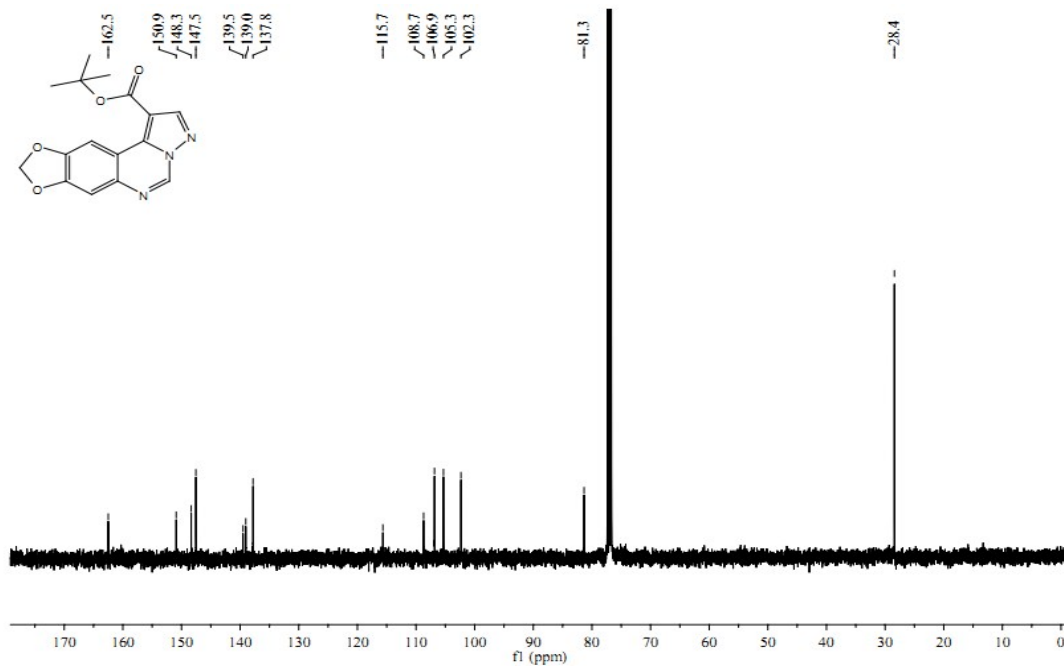

3bc

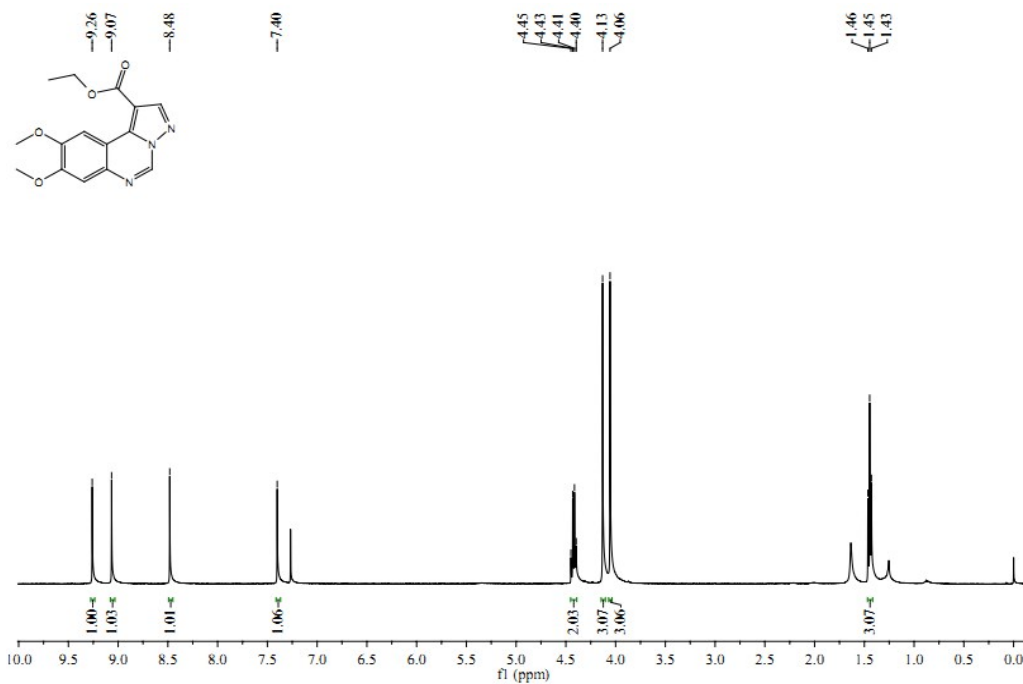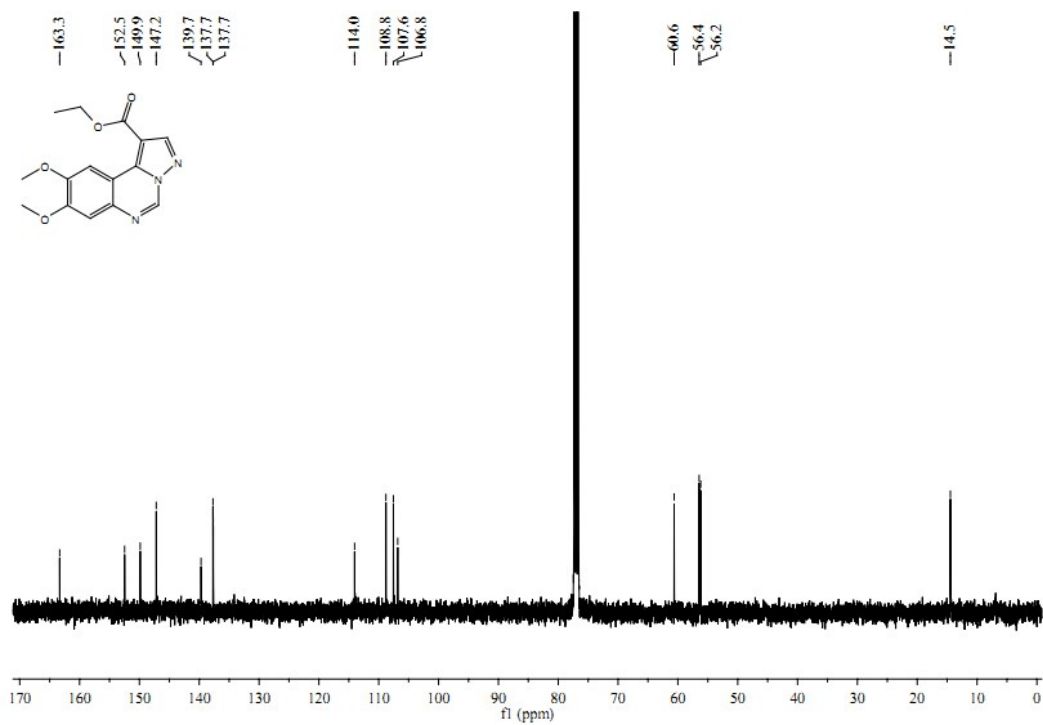

**3bd**

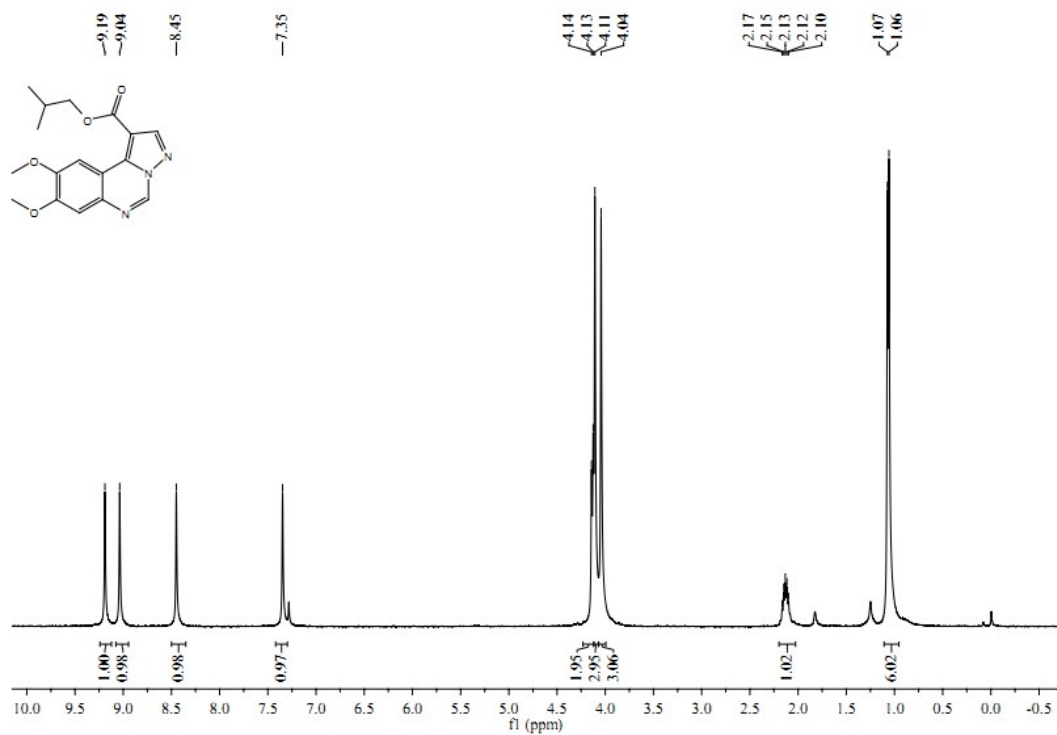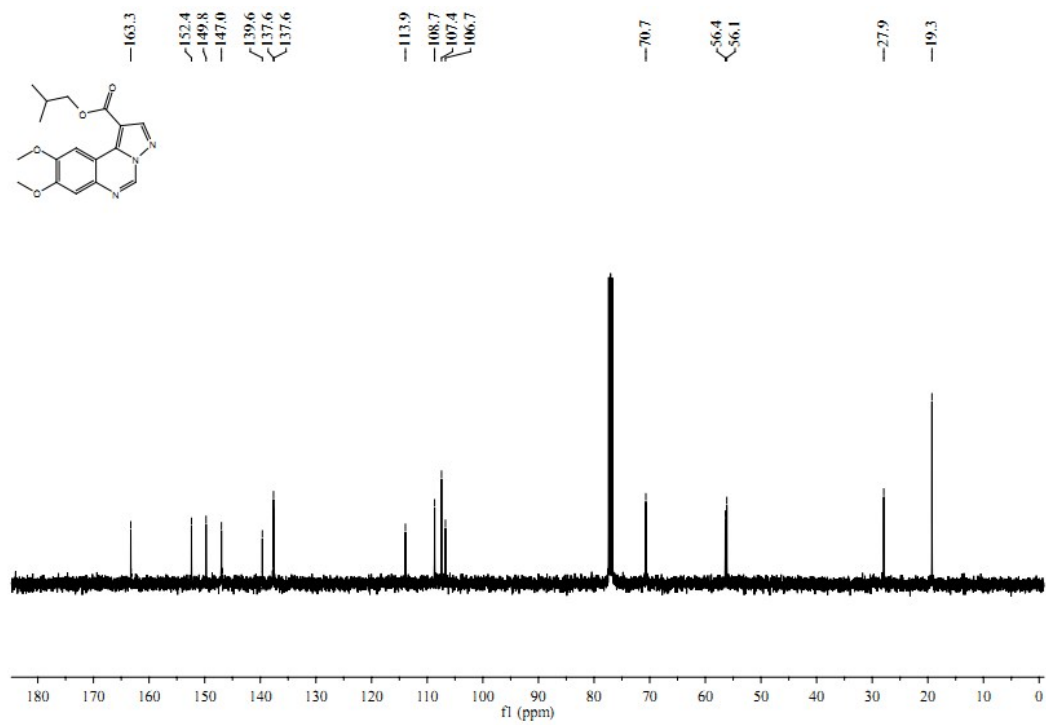

# Intermediate 4

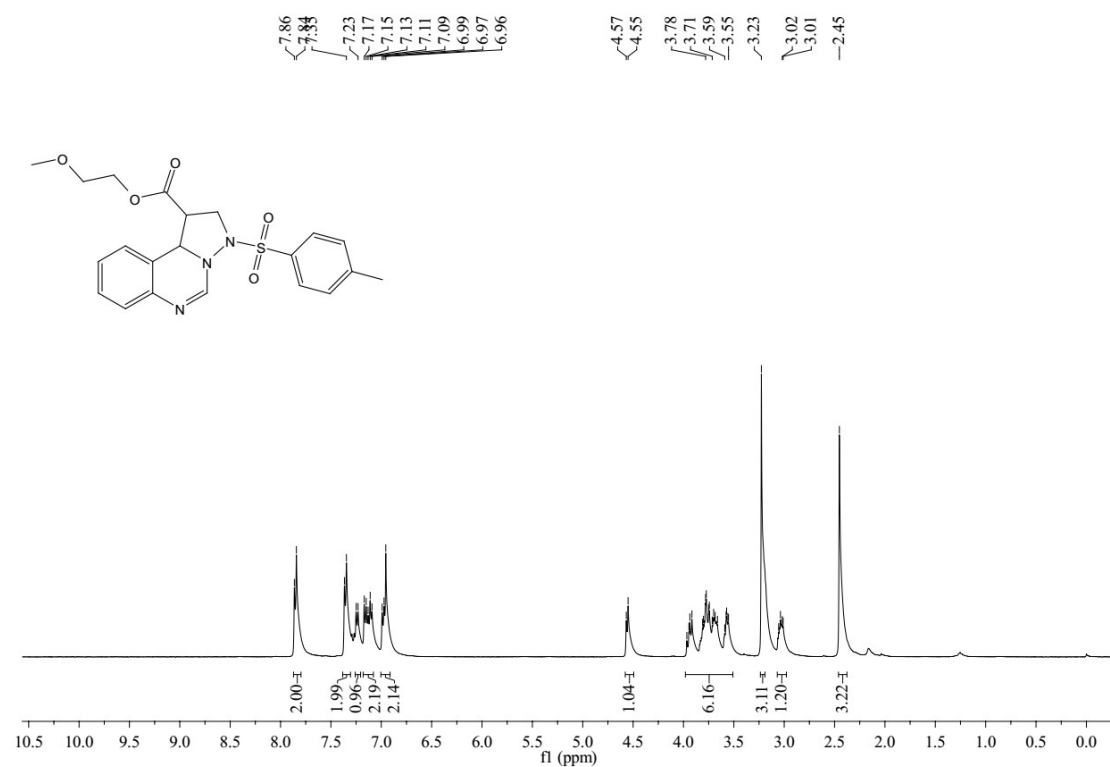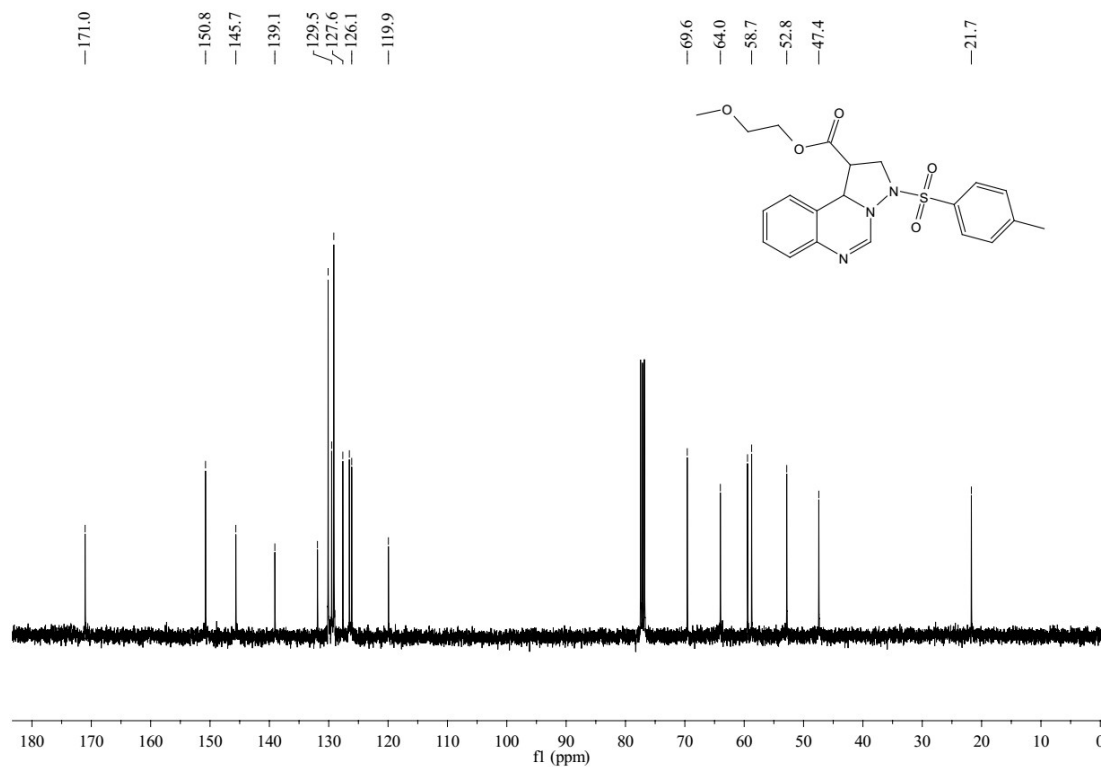

Supplement: c6ra22006a1.pdf [file c6ra22006a1.pdf]
